# Supplementary material
Source: publisher figshare collection journal article supplement (https://gsajournals.figshare.com/ndownloader/files/23623253)
Supplement: Supplementary file 1 [file 23623253]

## Sheet: SupTable6
Table S6: Orthologs identified between wBm, wDi, wMel, and wOo
wMel	wBm	wOo	wDi
PANOCT_1	wMel_cds0	wBm_cds335	wOo_cds639	wDi_fig|82301.12.peg.190
PANOCT_2	wMel_cds1	wBm_cds336	wOo_cds476	wDi_fig|82301.12.peg.722
PANOCT_3	wMel_cds2	wBm_cds337	wOo_cds475	wDi_fig|82301.12.peg.723
PANOCT_4	wMel_cds3	wBm_cds338	wOo_cds474	wDi_fig|82301.12.peg.724
PANOCT_5	wMel_cds4	wBm_cds339	wOo_cds473	wDi_fig|82301.12.peg.725
PANOCT_6	wMel_cds5	wBm_cds340	wOo_cds472	wDi_fig|82301.12.peg.726
PANOCT_7	wMel_cds6	wBm_cds341	wOo_cds471	wDi_fig|82301.12.peg.727
PANOCT_8	wMel_cds7	wBm_cds342	wOo_cds470	wDi_fig|82301.12.peg.728
PANOCT_9	wMel_cds8	wBm_cds343	wOo_cds469	wDi_fig|82301.12.peg.729
PANOCT_10	wMel_cds9	wBm_cds344	wOo_cds460	wDi_fig|82301.12.peg.742
PANOCT_11	wMel_cds10	wBm_cds416	wOo_cds100	wDi_fig|82301.12.peg.611
PANOCT_12	wMel_cds11	wBm_cds415	wOo_cds101	wDi_fig|82301.12.peg.610
PANOCT_13	wMel_cds12	wBm_cds414	wOo_cds102	wDi_fig|82301.12.peg.609
PANOCT_14	wMel_cds13	wBm_cds806	wOo_cds103	NA
PANOCT_15	wMel_cds14	wBm_cds805	wOo_cds104	wDi_fig|82301.12.peg.608
PANOCT_16	wMel_cds15	wBm_cds804	wOo_cds105	wDi_fig|82301.12.peg.607
PANOCT_17	wMel_cds16	wBm_cds803	wOo_cds106	wDi_fig|82301.12.peg.606
PANOCT_18	wMel_cds17	wBm_cds802	wOo_cds107	wDi_fig|82301.12.peg.605
PANOCT_19	wMel_cds18	wBm_cds801	wOo_cds108	wDi_fig|82301.12.peg.604
PANOCT_20	wMel_cds19	wBm_cds800	wOo_cds109	wDi_fig|82301.12.peg.603
PANOCT_21	wMel_cds20	wBm_cds799	wOo_cds110	wDi_fig|82301.12.peg.602
PANOCT_22	wMel_cds21	wBm_cds566	wOo_cds285	wDi_fig|82301.12.peg.515
PANOCT_23	wMel_cds23	wBm_cds567	wOo_cds287	wDi_fig|82301.12.peg.514
PANOCT_24	wMel_cds24	wBm_cds568	wOo_cds289	wDi_fig|82301.12.peg.513
PANOCT_25	wMel_cds25	wBm_cds569	wOo_cds290	wDi_fig|82301.12.peg.512
PANOCT_26	wMel_cds26	NA	NA	NA
PANOCT_27	wMel_cds27	NA	NA	NA
PANOCT_28	wMel_cds28	NA	NA	NA
PANOCT_29	wMel_cds29	wBm_cds111	NA	NA
PANOCT_30	wMel_cds30	wBm_cds125	wOo_cds250	wDi_fig|82301.12.peg.35
PANOCT_31	wMel_cds31	wBm_cds124	wOo_cds251	wDi_fig|82301.12.peg.34
PANOCT_32	wMel_cds32	wBm_cds572	NA	NA
PANOCT_33	wMel_cds33	wBm_cds574	wOo_cds152	wDi_fig|82301.12.peg.555
PANOCT_34	wMel_cds34	wBm_cds975	wOo_cds380	wDi_fig|82301.12.peg.861
PANOCT_35	wMel_cds35	wBm_cds315	NA	NA
PANOCT_36	wMel_cds36	NA	NA	NA
PANOCT_37	wMel_cds37	NA	NA	NA
PANOCT_38	wMel_cds38	NA	NA	NA
PANOCT_39	wMel_cds39	NA	NA	NA
PANOCT_40	wMel_cds40	NA	NA	NA
PANOCT_41	wMel_cds41	wBm_cds579	NA	NA
PANOCT_42	wMel_cds42	NA	NA	NA
PANOCT_43	wMel_cds43	wBm_cds80	NA	NA
PANOCT_44	wMel_cds44	wBm_cds782	NA	NA
PANOCT_45	wMel_cds45	wBm_cds778	wOo_cds536	wDi_fig|82301.12.peg.643
PANOCT_46	wMel_cds46	wBm_cds777	wOo_cds537	wDi_fig|82301.12.peg.642
PANOCT_47	wMel_cds47	wBm_cds815	NA	NA
PANOCT_48	wMel_cds48	wBm_cds814	NA	wDi_fig|82301.12.peg.275
PANOCT_49	wMel_cds49	wBm_cds813	wOo_cds710	NA
PANOCT_50	wMel_cds50	wBm_cds749	wOo_cds32	wDi_fig|82301.12.peg.325
PANOCT_51	wMel_cds51	wBm_cds748	wOo_cds33	wDi_fig|82301.12.peg.326
PANOCT_52	wMel_cds52	wBm_cds747	NA	NA
PANOCT_53	wMel_cds53	NA	NA	NA
PANOCT_54	wMel_cds54	NA	NA	NA
PANOCT_55	wMel_cds55	NA	NA	NA
PANOCT_56	wMel_cds56	wBm_cds702	wOo_cds4	wDi_fig|82301.12.peg.296
PANOCT_57	wMel_cds57	wBm_cds703	wOo_cds5	wDi_fig|82301.12.peg.297
PANOCT_58	wMel_cds58	wBm_cds704	wOo_cds6	wDi_fig|82301.12.peg.298
PANOCT_59	wMel_cds59	wBm_cds705	wOo_cds7	wDi_fig|82301.12.peg.299
PANOCT_60	wMel_cds60	wBm_cds706	wOo_cds8	wDi_fig|82301.12.peg.300
PANOCT_61	wMel_cds61	wBm_cds707	NA	NA
PANOCT_62	wMel_cds62	wBm_cds708	wOo_cds10	wDi_fig|82301.12.peg.301
PANOCT_63	wMel_cds63	NA	NA	NA
PANOCT_64	wMel_cds64	wBm_cds823	NA	NA
PANOCT_65	wMel_cds65	NA	NA	NA
PANOCT_66	wMel_cds66	wBm_cds420	NA	NA
PANOCT_67	wMel_cds67	wBm_cds419	NA	NA
PANOCT_68	wMel_cds68	wBm_cds418	NA	NA
PANOCT_69	wMel_cds69	wBm_cds417	NA	NA
PANOCT_70	wMel_cds70	NA	NA	NA
PANOCT_71	wMel_cds71	NA	NA	NA
PANOCT_72	wMel_cds72	NA	NA	NA
PANOCT_73	wMel_cds73	wBm_cds429	NA	wDi_fig|82301.12.peg.533
PANOCT_74	wMel_cds74	wBm_cds430	NA	NA
PANOCT_75	wMel_cds75	wBm_cds575	wOo_cds151	wDi_fig|82301.12.peg.556
PANOCT_76	wMel_cds76	wBm_cds980	wOo_cds425	wDi_fig|82301.12.peg.157
PANOCT_77	wMel_cds77	NA	NA	NA
PANOCT_78	wMel_cds78	NA	NA	NA
PANOCT_79	wMel_cds79	wBm_cds642	wOo_cds26	wDi_fig|82301.12.peg.318
PANOCT_80	wMel_cds80	wBm_cds497	NA	NA
PANOCT_81	wMel_cds81	wBm_cds498	wOo_cds311	wDi_fig|82301.12.peg.489
PANOCT_82	wMel_cds82	wBm_cds697	wOo_cds712	wDi_fig|82301.12.peg.284
PANOCT_83	wMel_cds83	wBm_cds698	wOo_cds711	wDi_fig|82301.12.peg.282
PANOCT_84	wMel_cds84	NA	NA	NA
PANOCT_85	wMel_cds85	wBm_cds700	wOo_cds97	wDi_fig|82301.12.peg.613
PANOCT_86	wMel_cds86	wBm_cds701	wOo_cds98	wDi_fig|82301.12.peg.612
PANOCT_87	wMel_cds87	wBm_cds350	wOo_cds386	wDi_fig|82301.12.peg.871
PANOCT_88	wMel_cds88	NA	NA	NA
PANOCT_89	wMel_cds89	wBm_cds2	NA	NA
PANOCT_90	wMel_cds90	NA	NA	NA
PANOCT_91	wMel_cds91	wBm_cds659	wOo_cds545	wDi_fig|82301.12.peg.632
PANOCT_92	wMel_cds92	wBm_cds660	wOo_cds546	wDi_fig|82301.12.peg.626
PANOCT_93	wMel_cds93	wBm_cds661	wOo_cds614	wDi_fig|82301.12.peg.777
PANOCT_94	wMel_cds94	wBm_cds662	wOo_cds615	wDi_fig|82301.12.peg.776
PANOCT_95	wMel_cds95	wBm_cds663	wOo_cds616	wDi_fig|82301.12.peg.775
PANOCT_96	wMel_cds96	wBm_cds664	wOo_cds617	wDi_fig|82301.12.peg.774
PANOCT_97	wMel_cds97	wBm_cds949	wOo_cds74	wDi_fig|82301.12.peg.378
PANOCT_98	wMel_cds98	NA	NA	NA
PANOCT_99	wMel_cds99	NA	NA	NA
PANOCT_100	wMel_cds100	NA	NA	NA
PANOCT_101	wMel_cds101	NA	NA	NA
PANOCT_102	wMel_cds102	wBm_cds970	wOo_cds429	wDi_fig|82301.12.peg.163
PANOCT_103	wMel_cds103	wBm_cds969	wOo_cds428	wDi_fig|82301.12.peg.162
PANOCT_104	wMel_cds104	wBm_cds106	wOo_cds131	wDi_fig|82301.12.peg.580
PANOCT_105	wMel_cds105	wBm_cds796	wOo_cds239	wDi_fig|82301.12.peg.46
PANOCT_106	wMel_cds106	wBm_cds797	wOo_cds238	NA
PANOCT_107	wMel_cds107	NA	NA	NA
PANOCT_108	wMel_cds108	wBm_cds211	NA	NA
PANOCT_109	wMel_cds109	NA	NA	NA
PANOCT_110	wMel_cds110	NA	NA	NA
PANOCT_111	wMel_cds111	wBm_cds784	NA	NA
PANOCT_112	wMel_cds112	NA	NA	NA
PANOCT_113	wMel_cds113	wBm_cds798	wOo_cds270	NA
PANOCT_114	wMel_cds114	wBm_cds100	wOo_cds135	wDi_fig|82301.12.peg.575
PANOCT_115	wMel_cds115	wBm_cds101	wOo_cds134	NA
PANOCT_116	wMel_cds116	wBm_cds102	NA	NA
PANOCT_117	wMel_cds117	wBm_cds103	wOo_cds133	wDi_fig|82301.12.peg.578
PANOCT_118	wMel_cds118	wBm_cds104	wOo_cds132	wDi_fig|82301.12.peg.579
PANOCT_119	wMel_cds119	NA	NA	NA
PANOCT_120	wMel_cds120	wBm_cds869	wOo_cds594	wDi_fig|82301.12.peg.802
PANOCT_121	wMel_cds121	wBm_cds868	wOo_cds593	wDi_fig|82301.12.peg.803
PANOCT_122	wMel_cds122	wBm_cds867	wOo_cds592	NA
PANOCT_123	wMel_cds123	NA	NA	NA
PANOCT_124	wMel_cds124	NA	NA	NA
PANOCT_125	wMel_cds125	NA	NA	NA
PANOCT_126	wMel_cds126	wBm_cds865	NA	NA
PANOCT_127	wMel_cds127	wBm_cds864	wOo_cds591	wDi_fig|82301.12.peg.806
PANOCT_128	wMel_cds128	wBm_cds863	NA	wDi_fig|82301.12.peg.808
PANOCT_129	wMel_cds129	wBm_cds862	wOo_cds66	wDi_fig|82301.12.peg.367
PANOCT_130	wMel_cds130	wBm_cds876	wOo_cds595	wDi_fig|82301.12.peg.801
PANOCT_131	wMel_cds131	wBm_cds614	NA	NA
PANOCT_132	wMel_cds132	wBm_cds845	wOo_cds54	wDi_fig|82301.12.peg.353
PANOCT_133	wMel_cds133	NA	wOo_cds53	wDi_fig|82301.12.peg.352
PANOCT_134	wMel_cds134	wBm_cds843	wOo_cds52	wDi_fig|82301.12.peg.351
PANOCT_135	wMel_cds135	NA	NA	wDi_fig|82301.12.peg.350
PANOCT_136	wMel_cds136	wBm_cds842	wOo_cds51	wDi_fig|82301.12.peg.349
PANOCT_137	wMel_cds137	wBm_cds841	wOo_cds50	wDi_fig|82301.12.peg.348
PANOCT_138	wMel_cds138	wBm_cds451	wOo_cds67	wDi_fig|82301.12.peg.368
PANOCT_139	wMel_cds139	wBm_cds450	wOo_cds68	wDi_fig|82301.12.peg.369
PANOCT_140	wMel_cds140	wBm_cds449	wOo_cds69	wDi_fig|82301.12.peg.370
PANOCT_141	wMel_cds141	wBm_cds448	wOo_cds70	wDi_fig|82301.12.peg.371
PANOCT_142	wMel_cds142	wBm_cds454	wOo_cds549	wDi_fig|82301.12.peg.623
PANOCT_143	wMel_cds143	wBm_cds456	wOo_cds22	wDi_fig|82301.12.peg.315
PANOCT_144	wMel_cds144	wBm_cds457	wOo_cds23	wDi_fig|82301.12.peg.316
PANOCT_145	wMel_cds145	wBm_cds458	wOo_cds24	wDi_fig|82301.12.peg.317
PANOCT_146	wMel_cds146	NA	NA	NA
PANOCT_147	wMel_cds147	NA	NA	NA
PANOCT_148	wMel_cds148	wBm_cds146	wOo_cds27	wDi_fig|82301.12.peg.319
PANOCT_149	wMel_cds149	wBm_cds145	wOo_cds28	wDi_fig|82301.12.peg.320
PANOCT_150	wMel_cds150	wBm_cds144	wOo_cds29	wDi_fig|82301.12.peg.321
PANOCT_151	wMel_cds151	wBm_cds143	wOo_cds111	wDi_fig|82301.12.peg.601
PANOCT_152	wMel_cds152	wBm_cds130	NA	NA
PANOCT_153	wMel_cds153	wBm_cds132	wOo_cds263	wDi_fig|82301.12.peg.17
PANOCT_154	wMel_cds154	wBm_cds133	NA	NA
PANOCT_155	wMel_cds155	wBm_cds666	wOo_cds608	wDi_fig|82301.12.peg.787
PANOCT_156	wMel_cds156	wBm_cds109	wOo_cds130	wDi_fig|82301.12.peg.582
PANOCT_157	wMel_cds157	wBm_cds110	wOo_cds129	wDi_fig|82301.12.peg.583
PANOCT_158	wMel_cds158	NA	NA	NA
PANOCT_159	wMel_cds159	NA	NA	NA
PANOCT_160	wMel_cds160	wBm_cds79	wOo_cds643	wDi_fig|82301.12.peg.198
PANOCT_161	wMel_cds161	NA	NA	NA
PANOCT_162	wMel_cds162	wBm_cds78	wOo_cds644	wDi_fig|82301.12.peg.199
PANOCT_163	wMel_cds163	wBm_cds77	NA	NA
PANOCT_164	wMel_cds164	NA	NA	NA
PANOCT_165	wMel_cds165	NA	NA	NA
PANOCT_166	wMel_cds166	NA	NA	NA
PANOCT_167	wMel_cds167	NA	NA	NA
PANOCT_168	wMel_cds168	wBm_cds313	wOo_cds19	wDi_fig|82301.12.peg.310
PANOCT_169	wMel_cds169	wBm_cds312	wOo_cds20	wDi_fig|82301.12.peg.312
PANOCT_170	wMel_cds170	wBm_cds311	wOo_cds21	wDi_fig|82301.12.peg.313
PANOCT_171	wMel_cds171	NA	NA	NA
PANOCT_172	wMel_cds172	wBm_cds310	wOo_cds71	wDi_fig|82301.12.peg.372
PANOCT_173	wMel_cds173	NA	NA	NA
PANOCT_174	wMel_cds174	NA	NA	NA
PANOCT_175	wMel_cds175	wBm_cds541	wOo_cds292	wDi_fig|82301.12.peg.510
PANOCT_176	wMel_cds176	wBm_cds542	wOo_cds291	wDi_fig|82301.12.peg.511
PANOCT_177	wMel_cds177	wBm_cds861	wOo_cds65	wDi_fig|82301.12.peg.366
PANOCT_178	wMel_cds178	wBm_cds860	wOo_cds64	wDi_fig|82301.12.peg.365
PANOCT_179	wMel_cds179	wBm_cds859	wOo_cds63	wDi_fig|82301.12.peg.364
PANOCT_180	wMel_cds180	wBm_cds858	wOo_cds62	wDi_fig|82301.12.peg.363
PANOCT_181	wMel_cds181	wBm_cds857	wOo_cds61	wDi_fig|82301.12.peg.361
PANOCT_182	wMel_cds182	wBm_cds856	wOo_cds60	wDi_fig|82301.12.peg.360
PANOCT_183	wMel_cds183	wBm_cds855	wOo_cds59	wDi_fig|82301.12.peg.359
PANOCT_184	wMel_cds184	wBm_cds854	wOo_cds58	wDi_fig|82301.12.peg.358
PANOCT_185	wMel_cds185	NA	NA	NA
PANOCT_186	wMel_cds186	NA	NA	NA
PANOCT_187	wMel_cds187	NA	NA	NA
PANOCT_188	wMel_cds188	wBm_cds138	wOo_cds167	wDi_fig|82301.12.peg.537
PANOCT_189	wMel_cds189	wBm_cds139	wOo_cds168	wDi_fig|82301.12.peg.536
PANOCT_190	wMel_cds190	wBm_cds140	wOo_cds169	wDi_fig|82301.12.peg.535
PANOCT_191	wMel_cds191	wBm_cds141	wOo_cds170	wDi_fig|82301.12.peg.534
PANOCT_192	wMel_cds192	wBm_cds325	wOo_cds164	wDi_fig|82301.12.peg.543
PANOCT_193	wMel_cds193	wBm_cds326	wOo_cds163	wDi_fig|82301.12.peg.544
PANOCT_194	wMel_cds194	wBm_cds327	NA	NA
PANOCT_195	wMel_cds195	NA	NA	NA
PANOCT_196	wMel_cds196	wBm_cds546	NA	wDi_fig|82301.12.peg.453
PANOCT_197	wMel_cds197	wBm_cds348	wOo_cds99	NA
PANOCT_198	wMel_cds198	wBm_cds225	wOo_cds450	wDi_fig|82301.12.peg.754
PANOCT_199	wMel_cds199	wBm_cds224	wOo_cds451	wDi_fig|82301.12.peg.753
PANOCT_200	wMel_cds200	wBm_cds223	wOo_cds452	wDi_fig|82301.12.peg.752
PANOCT_201	wMel_cds201	wBm_cds222	wOo_cds453	wDi_fig|82301.12.peg.751
PANOCT_202	wMel_cds202	NA	NA	NA
PANOCT_203	wMel_cds203	wBm_cds465	NA	NA
PANOCT_204	wMel_cds204	wBm_cds76	wOo_cds376	wDi_fig|82301.12.peg.854
PANOCT_205	wMel_cds205	wBm_cds982	wOo_cds424	wDi_fig|82301.12.peg.155
PANOCT_206	wMel_cds206	wBm_cds981	NA	NA
PANOCT_207	wMel_cds207	wBm_cds547	wOo_cds331	wDi_fig|82301.12.peg.455
PANOCT_208	wMel_cds208	wBm_cds345	NA	NA
PANOCT_209	wMel_cds209	wBm_cds346	wOo_cds461	wDi_fig|82301.12.peg.740
PANOCT_210	wMel_cds210	NA	NA	NA
PANOCT_211	wMel_cds211	wBm_cds494	NA	NA
PANOCT_212	wMel_cds212	wBm_cds228	wOo_cds462	wDi_fig|82301.12.peg.739
PANOCT_213	wMel_cds213	wBm_cds229	NA	NA
PANOCT_214	wMel_cds214	wBm_cds230	wOo_cds463	wDi_fig|82301.12.peg.738
PANOCT_215	wMel_cds215	wBm_cds231	wOo_cds464	wDi_fig|82301.12.peg.737
PANOCT_216	wMel_cds216	wBm_cds232	wOo_cds465	wDi_fig|82301.12.peg.736
PANOCT_217	wMel_cds217	NA	NA	NA
PANOCT_218	wMel_cds218	NA	NA	NA
PANOCT_219	wMel_cds219	wBm_cds431	wOo_cds342	wDi_fig|82301.12.peg.439
PANOCT_220	wMel_cds220	wBm_cds432	wOo_cds341	wDi_fig|82301.12.peg.440
PANOCT_221	wMel_cds221	wBm_cds433	wOo_cds340	wDi_fig|82301.12.peg.441
PANOCT_222	wMel_cds222	wBm_cds434	wOo_cds339	wDi_fig|82301.12.peg.442
PANOCT_223	wMel_cds223	wBm_cds435	wOo_cds338	wDi_fig|82301.12.peg.443
PANOCT_224	wMel_cds224	wBm_cds436	NA	NA
PANOCT_225	wMel_cds225	NA	NA	NA
PANOCT_226	wMel_cds226	wBm_cds947	wOo_cds321	wDi_fig|82301.12.peg.472
PANOCT_227	wMel_cds227	NA	NA	NA
PANOCT_228	wMel_cds228	NA	NA	NA
PANOCT_229	wMel_cds229	wBm_cds888	wOo_cds394	wDi_fig|82301.12.peg.120
PANOCT_230	wMel_cds230	NA	NA	NA
PANOCT_231	wMel_cds231	NA	NA	NA
PANOCT_232	wMel_cds232	NA	NA	NA
PANOCT_233	wMel_cds233	NA	NA	NA
PANOCT_234	wMel_cds234	NA	NA	NA
PANOCT_235	wMel_cds235	NA	NA	NA
PANOCT_236	wMel_cds236	NA	NA	NA
PANOCT_237	wMel_cds237	NA	NA	NA
PANOCT_238	wMel_cds238	wBm_cds300	wOo_cds495	NA
PANOCT_239	wMel_cds239	NA	NA	NA
PANOCT_240	wMel_cds240	NA	NA	NA
PANOCT_241	wMel_cds241	NA	NA	NA
PANOCT_242	wMel_cds242	NA	NA	NA
PANOCT_243	wMel_cds243	NA	NA	NA
PANOCT_244	wMel_cds244	NA	NA	NA
PANOCT_245	wMel_cds245	NA	NA	NA
PANOCT_246	wMel_cds246	NA	NA	NA
PANOCT_247	wMel_cds247	NA	NA	NA
PANOCT_248	wMel_cds248	NA	NA	NA
PANOCT_249	wMel_cds249	NA	NA	NA
PANOCT_250	wMel_cds250	NA	NA	NA
PANOCT_251	wMel_cds251	NA	NA	NA
PANOCT_252	wMel_cds252	NA	NA	NA
PANOCT_253	wMel_cds253	NA	NA	NA
PANOCT_254	wMel_cds254	NA	NA	NA
PANOCT_255	wMel_cds255	NA	NA	NA
PANOCT_256	wMel_cds256	NA	NA	NA
PANOCT_257	wMel_cds257	NA	NA	NA
PANOCT_258	wMel_cds258	NA	NA	NA
PANOCT_259	wMel_cds259	NA	NA	NA
PANOCT_260	wMel_cds260	NA	NA	NA
PANOCT_261	wMel_cds261	NA	NA	NA
PANOCT_262	wMel_cds262	NA	NA	NA
PANOCT_263	wMel_cds263	NA	NA	NA
PANOCT_264	wMel_cds264	NA	NA	NA
PANOCT_265	wMel_cds265	NA	NA	NA
PANOCT_266	wMel_cds266	NA	NA	NA
PANOCT_267	wMel_cds267	wBm_cds347	NA	NA
PANOCT_268	wMel_cds268	NA	NA	NA
PANOCT_269	wMel_cds269	NA	NA	NA
PANOCT_270	wMel_cds270	NA	NA	NA
PANOCT_271	wMel_cds271	NA	NA	NA
PANOCT_272	wMel_cds272	NA	NA	NA
PANOCT_273	wMel_cds273	NA	NA	NA
PANOCT_274	wMel_cds274	NA	NA	NA
PANOCT_275	wMel_cds275	NA	NA	NA
PANOCT_276	wMel_cds276	wBm_cds377	wOo_cds369	wDi_fig|82301.12.peg.845
PANOCT_277	wMel_cds277	wBm_cds376	wOo_cds370	wDi_fig|82301.12.peg.846
PANOCT_278	wMel_cds278	wBm_cds375	wOo_cds371	wDi_fig|82301.12.peg.847
PANOCT_279	wMel_cds279	wBm_cds374	wOo_cds372	wDi_fig|82301.12.peg.849
PANOCT_280	wMel_cds280	wBm_cds373	wOo_cds373	wDi_fig|82301.12.peg.850
PANOCT_281	wMel_cds281	wBm_cds424	wOo_cds397	wDi_fig|82301.12.peg.124
PANOCT_282	wMel_cds282	wBm_cds423	wOo_cds396	wDi_fig|82301.12.peg.122
PANOCT_283	wMel_cds283	wBm_cds422	wOo_cds395	wDi_fig|82301.12.peg.121
PANOCT_284	wMel_cds284	wBm_cds156	wOo_cds77	wDi_fig|82301.12.peg.383
PANOCT_285	wMel_cds285	NA	NA	NA
PANOCT_286	wMel_cds286	NA	NA	NA
PANOCT_287	wMel_cds287	NA	NA	NA
PANOCT_288	wMel_cds288	wBm_cds503	wOo_cds313	wDi_fig|82301.12.peg.483
PANOCT_289	wMel_cds289	NA	NA	NA
PANOCT_290	wMel_cds290	wBm_cds678	wOo_cds624	wDi_fig|82301.12.peg.764
PANOCT_291	wMel_cds291	wBm_cds679	wOo_cds625	wDi_fig|82301.12.peg.763
PANOCT_292	wMel_cds292	wBm_cds680	wOo_cds626	wDi_fig|82301.12.peg.762
PANOCT_293	wMel_cds293	wBm_cds681	wOo_cds627	wDi_fig|82301.12.peg.761
PANOCT_294	wMel_cds294	wBm_cds682	wOo_cds628	wDi_fig|82301.12.peg.759
PANOCT_295	wMel_cds295	wBm_cds683	wOo_cds629	wDi_fig|82301.12.peg.758
PANOCT_296	wMel_cds296	wBm_cds684	wOo_cds630	wDi_fig|82301.12.peg.757
PANOCT_297	wMel_cds297	NA	NA	NA
PANOCT_298	wMel_cds298	wBm_cds686	wOo_cds631	wDi_fig|82301.12.peg.756
PANOCT_299	wMel_cds299	NA	NA	NA
PANOCT_300	wMel_cds300	NA	NA	NA
PANOCT_301	wMel_cds301	NA	NA	NA
PANOCT_302	wMel_cds302	NA	NA	NA
PANOCT_303	wMel_cds303	NA	NA	NA
PANOCT_304	wMel_cds304	NA	NA	NA
PANOCT_305	wMel_cds305	wBm_cds241	wOo_cds468	wDi_fig|82301.12.peg.730
PANOCT_306	wMel_cds306	wBm_cds242	NA	NA
PANOCT_307	wMel_cds307	wBm_cds234	wOo_cds467	wDi_fig|82301.12.peg.734
PANOCT_308	wMel_cds308	wBm_cds233	wOo_cds466	wDi_fig|82301.12.peg.735
PANOCT_309	wMel_cds309	wBm_cds333	NA	NA
PANOCT_310	wMel_cds310	NA	NA	NA
PANOCT_311	wMel_cds311	wBm_cds332	wOo_cds641	wDi_fig|82301.12.peg.195
PANOCT_312	wMel_cds312	wBm_cds787	NA	NA
PANOCT_313	wMel_cds313	NA	NA	NA
PANOCT_314	wMel_cds314	wBm_cds783	wOo_cds532	wDi_fig|82301.12.peg.647
PANOCT_315	wMel_cds315	wBm_cds781	wOo_cds533	wDi_fig|82301.12.peg.646
PANOCT_316	wMel_cds316	wBm_cds780	wOo_cds534	wDi_fig|82301.12.peg.645
PANOCT_317	wMel_cds317	wBm_cds779	NA	NA
PANOCT_318	wMel_cds318	NA	NA	NA
PANOCT_319	wMel_cds319	NA	NA	NA
PANOCT_320	wMel_cds320	NA	NA	NA
PANOCT_321	wMel_cds321	NA	NA	NA
PANOCT_322	wMel_cds322	wBm_cds840	NA	NA
PANOCT_323	wMel_cds323	wBm_cds13	NA	NA
PANOCT_324	wMel_cds324	wBm_cds236	wOo_cds393	wDi_fig|82301.12.peg.119
PANOCT_325	wMel_cds325	NA	NA	NA
PANOCT_326	wMel_cds326	wBm_cds237	wOo_cds392	wDi_fig|82301.12.peg.118
PANOCT_327	wMel_cds327	wBm_cds238	NA	NA
PANOCT_328	wMel_cds328	wBm_cds239	wOo_cds391	wDi_fig|82301.12.peg.117
PANOCT_329	wMel_cds329	NA	NA	NA
PANOCT_330	wMel_cds330	wBm_cds364	wOo_cds390	wDi_fig|82301.12.peg.116
PANOCT_331	wMel_cds331	wBm_cds365	wOo_cds389	wDi_fig|82301.12.peg.115
PANOCT_332	wMel_cds332	wBm_cds210	NA	NA
PANOCT_333	wMel_cds333	NA	wOo_cds632	NA
PANOCT_334	wMel_cds334	wBm_cds212	wOo_cds582	wDi_fig|82301.12.peg.817
PANOCT_335	wMel_cds335	wBm_cds213	wOo_cds581	wDi_fig|82301.12.peg.818
PANOCT_336	wMel_cds336	wBm_cds214	wOo_cds580	wDi_fig|82301.12.peg.819
PANOCT_337	wMel_cds337	wBm_cds215	wOo_cds579	wDi_fig|82301.12.peg.820
PANOCT_338	wMel_cds338	NA	NA	NA
PANOCT_339	wMel_cds339	wBm_cds216	wOo_cds578	wDi_fig|82301.12.peg.821
PANOCT_340	wMel_cds340	wBm_cds217	NA	NA
PANOCT_341	wMel_cds341	NA	NA	NA
PANOCT_342	wMel_cds342	wBm_cds218	wOo_cds576	wDi_fig|82301.12.peg.822
PANOCT_343	wMel_cds343	wBm_cds219	wOo_cds575	wDi_fig|82301.12.peg.823
PANOCT_344	wMel_cds344	NA	NA	NA
PANOCT_345	wMel_cds345	NA	NA	NA
PANOCT_346	wMel_cds346	NA	NA	NA
PANOCT_347	wMel_cds347	wBm_cds357	wOo_cds377	wDi_fig|82301.12.peg.856
PANOCT_348	wMel_cds348	wBm_cds356	wOo_cds378	wDi_fig|82301.12.peg.857
PANOCT_349	wMel_cds349	NA	NA	NA
PANOCT_350	wMel_cds350	NA	NA	NA
PANOCT_351	wMel_cds351	wBm_cds355	wOo_cds676	wDi_fig|82301.12.peg.243
PANOCT_352	wMel_cds352	wBm_cds353	wOo_cds388	wDi_fig|82301.12.peg.114
PANOCT_353	wMel_cds353	NA	NA	NA
PANOCT_354	wMel_cds354	NA	NA	NA
PANOCT_355	wMel_cds355	wBm_cds370	NA	NA
PANOCT_356	wMel_cds356	wBm_cds371	NA	NA
PANOCT_357	wMel_cds357	wBm_cds248	wOo_cds642	wDi_fig|82301.12.peg.197
PANOCT_358	wMel_cds358	NA	NA	NA
PANOCT_359	wMel_cds359	wBm_cds821	wOo_cds459	wDi_fig|82301.12.peg.744
PANOCT_360	wMel_cds360	wBm_cds820	wOo_cds458	wDi_fig|82301.12.peg.745
PANOCT_361	wMel_cds361	wBm_cds819	wOo_cds457	wDi_fig|82301.12.peg.746
PANOCT_362	wMel_cds362	wBm_cds367	wOo_cds456	wDi_fig|82301.12.peg.748
PANOCT_363	wMel_cds363	wBm_cds368	wOo_cds455	wDi_fig|82301.12.peg.749
PANOCT_364	wMel_cds364	wBm_cds369	wOo_cds454	wDi_fig|82301.12.peg.750
PANOCT_365	wMel_cds365	wBm_cds249	wOo_cds565	wDi_fig|82301.12.peg.834
PANOCT_366	wMel_cds366	wBm_cds250	NA	NA
PANOCT_367	wMel_cds367	NA	NA	NA
PANOCT_368	wMel_cds368	NA	NA	wDi_fig|82301.12.peg.813
PANOCT_369	wMel_cds369	NA	NA	NA
PANOCT_370	wMel_cds370	NA	NA	NA
PANOCT_371	wMel_cds371	NA	NA	NA
PANOCT_372	wMel_cds372	NA	NA	NA
PANOCT_373	wMel_cds373	wBm_cds251	wOo_cds566	wDi_fig|82301.12.peg.831
PANOCT_374	wMel_cds374	NA	NA	NA
PANOCT_375	wMel_cds375	wBm_cds253	wOo_cds568	wDi_fig|82301.12.peg.830
PANOCT_376	wMel_cds376	NA	NA	NA
PANOCT_377	wMel_cds377	NA	NA	NA
PANOCT_378	wMel_cds378	NA	NA	NA
PANOCT_379	wMel_cds379	wBm_cds254	wOo_cds569	wDi_fig|82301.12.peg.829
PANOCT_380	wMel_cds380	wBm_cds17	wOo_cds144	wDi_fig|82301.12.peg.563
PANOCT_381	wMel_cds381	wBm_cds16	wOo_cds145	wDi_fig|82301.12.peg.562
PANOCT_382	wMel_cds382	wBm_cds15	wOo_cds146	wDi_fig|82301.12.peg.561
PANOCT_383	wMel_cds383	wBm_cds14	wOo_cds147	wDi_fig|82301.12.peg.560
PANOCT_384	wMel_cds384	wBm_cds255	wOo_cds570	wDi_fig|82301.12.peg.828
PANOCT_385	wMel_cds385	wBm_cds256	wOo_cds571	wDi_fig|82301.12.peg.827
PANOCT_386	wMel_cds386	wBm_cds257	wOo_cds572	wDi_fig|82301.12.peg.826
PANOCT_387	wMel_cds387	wBm_cds442	wOo_cds333	wDi_fig|82301.12.peg.451
PANOCT_388	wMel_cds388	NA	NA	NA
PANOCT_389	wMel_cds389	wBm_cds441	wOo_cds334	wDi_fig|82301.12.peg.450
PANOCT_390	wMel_cds390	wBm_cds440	wOo_cds335	wDi_fig|82301.12.peg.449
PANOCT_391	wMel_cds391	wBm_cds565	wOo_cds387	wDi_fig|82301.12.peg.112
PANOCT_392	wMel_cds392	wBm_cds564	NA	NA
PANOCT_393	wMel_cds393	wBm_cds563	wOo_cds34	wDi_fig|82301.12.peg.328
PANOCT_394	wMel_cds394	wBm_cds562	wOo_cds35	wDi_fig|82301.12.peg.329
PANOCT_395	wMel_cds395	wBm_cds561	wOo_cds36	wDi_fig|82301.12.peg.331
PANOCT_396	wMel_cds396	wBm_cds560	wOo_cds37	wDi_fig|82301.12.peg.332
PANOCT_397	wMel_cds397	wBm_cds559	wOo_cds38	NA
PANOCT_398	wMel_cds398	wBm_cds558	wOo_cds39	NA
PANOCT_399	wMel_cds399	wBm_cds557	wOo_cds40	wDi_fig|82301.12.peg.336
PANOCT_400	wMel_cds400	wBm_cds556	NA	NA
PANOCT_401	wMel_cds401	wBm_cds555	wOo_cds41	wDi_fig|82301.12.peg.338
PANOCT_402	wMel_cds402	NA	NA	NA
PANOCT_403	wMel_cds403	wBm_cds549	wOo_cds329	wDi_fig|82301.12.peg.457
PANOCT_404	wMel_cds404	wBm_cds548	wOo_cds330	wDi_fig|82301.12.peg.456
PANOCT_405	wMel_cds405	wBm_cds711	wOo_cds13	wDi_fig|82301.12.peg.304
PANOCT_406	wMel_cds406	wBm_cds712	wOo_cds14	wDi_fig|82301.12.peg.305
PANOCT_407	wMel_cds407	wBm_cds713	wOo_cds15	wDi_fig|82301.12.peg.306
PANOCT_408	wMel_cds408	NA	NA	NA
PANOCT_409	wMel_cds409	wBm_cds197	wOo_cds646	wDi_fig|82301.12.peg.206
PANOCT_410	wMel_cds410	NA	NA	NA
PANOCT_411	wMel_cds411	wBm_cds198	wOo_cds645	wDi_fig|82301.12.peg.203
PANOCT_412	wMel_cds412	NA	NA	NA
PANOCT_413	wMel_cds413	NA	NA	NA
PANOCT_414	wMel_cds414	wBm_cds204	NA	NA
PANOCT_415	wMel_cds415	NA	NA	NA
PANOCT_416	wMel_cds416	NA	NA	NA
PANOCT_417	wMel_cds417	wBm_cds362	wOo_cds375	wDi_fig|82301.12.peg.852
PANOCT_418	wMel_cds418	wBm_cds361	wOo_cds374	wDi_fig|82301.12.peg.851
PANOCT_419	wMel_cds419	NA	NA	NA
PANOCT_420	wMel_cds420	NA	NA	NA
PANOCT_421	wMel_cds421	NA	NA	NA
PANOCT_422	wMel_cds422	NA	NA	NA
PANOCT_423	wMel_cds423	NA	NA	NA
PANOCT_424	wMel_cds424	wBm_cds890	NA	NA
PANOCT_425	wMel_cds425	wBm_cds280	NA	NA
PANOCT_426	wMel_cds426	NA	NA	NA
PANOCT_427	wMel_cds427	wBm_cds977	wOo_cds383	wDi_fig|82301.12.peg.867
PANOCT_428	wMel_cds428	wBm_cds974	NA	NA
PANOCT_429	wMel_cds429	NA	NA	NA
PANOCT_430	wMel_cds430	NA	NA	NA
PANOCT_431	wMel_cds431	wBm_cds976	wOo_cds384	wDi_fig|82301.12.peg.869
PANOCT_432	wMel_cds432	NA	wOo_cds385	wDi_fig|82301.12.peg.870
PANOCT_433	wMel_cds433	wBm_cds349	NA	NA
PANOCT_434	wMel_cds434	wBm_cds209	wOo_cds583	wDi_fig|82301.12.peg.816
PANOCT_435	wMel_cds435	wBm_cds208	wOo_cds584	wDi_fig|82301.12.peg.815
PANOCT_436	wMel_cds436	wBm_cds207	wOo_cds585	wDi_fig|82301.12.peg.814
PANOCT_437	wMel_cds437	wBm_cds205	wOo_cds586	wDi_fig|82301.12.peg.812
PANOCT_438	wMel_cds438	NA	NA	NA
PANOCT_439	wMel_cds439	NA	NA	NA
PANOCT_440	wMel_cds440	wBm_cds824	wOo_cds379	wDi_fig|82301.12.peg.858
PANOCT_441	wMel_cds441	NA	NA	NA
PANOCT_442	wMel_cds442	wBm_cds826	wOo_cds430	wDi_fig|82301.12.peg.164
PANOCT_443	wMel_cds443	wBm_cds827	wOo_cds431	wDi_fig|82301.12.peg.165
PANOCT_444	wMel_cds444	NA	NA	NA
PANOCT_445	wMel_cds445	NA	NA	NA
PANOCT_446	wMel_cds446	NA	NA	NA
PANOCT_447	wMel_cds447	wBm_cds830	wOo_cds432	NA
PANOCT_448	wMel_cds448	wBm_cds831	wOo_cds433	wDi_fig|82301.12.peg.167
PANOCT_449	wMel_cds449	wBm_cds833	wOo_cds434	wDi_fig|82301.12.peg.168
PANOCT_450	wMel_cds450	wBm_cds834	wOo_cds435	wDi_fig|82301.12.peg.169
PANOCT_451	wMel_cds451	wBm_cds835	NA	NA
PANOCT_452	wMel_cds452	wBm_cds836	wOo_cds436	wDi_fig|82301.12.peg.172
PANOCT_453	wMel_cds453	wBm_cds837	wOo_cds437	wDi_fig|82301.12.peg.173
PANOCT_454	wMel_cds454	NA	NA	NA
PANOCT_455	wMel_cds455	wBm_cds838	wOo_cds438	wDi_fig|82301.12.peg.174
PANOCT_456	wMel_cds456	wBm_cds839	wOo_cds439	wDi_fig|82301.12.peg.175
PANOCT_457	wMel_cds457	wBm_cds615	wOo_cds83	wDi_fig|82301.12.peg.389
PANOCT_458	wMel_cds458	wBm_cds151	wOo_cds269	wDi_fig|82301.12.peg.12
PANOCT_459	wMel_cds459	wBm_cds150	wOo_cds268	wDi_fig|82301.12.peg.13
PANOCT_460	wMel_cds460	wBm_cds149	wOo_cds267	wDi_fig|82301.12.peg.14
PANOCT_461	wMel_cds461	wBm_cds148	wOo_cds266	wDi_fig|82301.12.peg.15
PANOCT_462	wMel_cds462	NA	NA	NA
PANOCT_463	wMel_cds463	wBm_cds134	wOo_cds264	NA
PANOCT_464	wMel_cds464	wBm_cds121	NA	NA
PANOCT_465	wMel_cds465	wBm_cds122	wOo_cds253	wDi_fig|82301.12.peg.32
PANOCT_466	wMel_cds466	wBm_cds123	wOo_cds252	wDi_fig|82301.12.peg.33
PANOCT_467	wMel_cds467	wBm_cds948	wOo_cds322	wDi_fig|82301.12.peg.471
PANOCT_468	wMel_cds468	NA	NA	NA
PANOCT_469	wMel_cds469	NA	NA	NA
PANOCT_470	wMel_cds470	NA	NA	NA
PANOCT_471	wMel_cds471	NA	NA	NA
PANOCT_472	wMel_cds472	NA	NA	NA
PANOCT_473	wMel_cds473	NA	NA	NA
PANOCT_474	wMel_cds474	NA	NA	NA
PANOCT_475	wMel_cds475	NA	NA	NA
PANOCT_476	wMel_cds476	NA	NA	NA
PANOCT_477	wMel_cds477	NA	NA	NA
PANOCT_478	wMel_cds478	NA	NA	NA
PANOCT_479	wMel_cds479	NA	NA	NA
PANOCT_480	wMel_cds480	NA	NA	NA
PANOCT_481	wMel_cds481	NA	NA	NA
PANOCT_482	wMel_cds482	NA	NA	NA
PANOCT_483	wMel_cds483	NA	NA	NA
PANOCT_484	wMel_cds484	NA	NA	NA
PANOCT_485	wMel_cds485	NA	NA	NA
PANOCT_486	wMel_cds486	wBm_cds993	wOo_cds650	wDi_fig|82301.12.peg.215
PANOCT_487	wMel_cds487	wBm_cds994	wOo_cds651	wDi_fig|82301.12.peg.216
PANOCT_488	wMel_cds488	wBm_cds995	wOo_cds652	wDi_fig|82301.12.peg.217
PANOCT_489	wMel_cds489	wBm_cds996	wOo_cds653	wDi_fig|82301.12.peg.218
PANOCT_490	wMel_cds490	wBm_cds997	wOo_cds654	wDi_fig|82301.12.peg.219
PANOCT_491	wMel_cds491	NA	NA	NA
PANOCT_492	wMel_cds492	wBm_cds999	wOo_cds656	wDi_fig|82301.12.peg.221
PANOCT_493	wMel_cds493	wBm_cds1000	wOo_cds657	wDi_fig|82301.12.peg.222
PANOCT_494	wMel_cds494	wBm_cds1001	wOo_cds658	wDi_fig|82301.12.peg.223
PANOCT_495	wMel_cds495	wBm_cds1002	wOo_cds659	wDi_fig|82301.12.peg.224
PANOCT_496	wMel_cds496	wBm_cds272	wOo_cds246	wDi_fig|82301.12.peg.39
PANOCT_497	wMel_cds497	wBm_cds273	wOo_cds247	wDi_fig|82301.12.peg.38
PANOCT_498	wMel_cds498	wBm_cds665	NA	NA
PANOCT_499	wMel_cds499	NA	NA	NA
PANOCT_500	wMel_cds500	NA	NA	NA
PANOCT_501	wMel_cds501	NA	NA	NA
PANOCT_502	wMel_cds502	NA	NA	NA
PANOCT_503	wMel_cds503	wBm_cds967	wOo_cds427	wDi_fig|82301.12.peg.159
PANOCT_504	wMel_cds504	wBm_cds966	wOo_cds426	wDi_fig|82301.12.peg.158
PANOCT_505	wMel_cds505	wBm_cds137	wOo_cds166	wDi_fig|82301.12.peg.538
PANOCT_506	wMel_cds506	NA	NA	NA
PANOCT_507	wMel_cds507	wBm_cds874	NA	NA
PANOCT_508	wMel_cds508	wBm_cds964	NA	NA
PANOCT_509	wMel_cds509	wBm_cds751	NA	NA
PANOCT_510	wMel_cds510	wBm_cds323	wOo_cds165	wDi_fig|82301.12.peg.542
PANOCT_511	wMel_cds511	wBm_cds490	NA	NA
PANOCT_512	wMel_cds512	wBm_cds852	wOo_cds57	wDi_fig|82301.12.peg.357
PANOCT_513	wMel_cds513	NA	NA	NA
PANOCT_514	wMel_cds514	NA	NA	NA
PANOCT_515	wMel_cds515	NA	NA	NA
PANOCT_516	wMel_cds516	NA	NA	NA
PANOCT_517	wMel_cds517	wBm_cds90	wOo_cds197	wDi_fig|82301.12.peg.95
PANOCT_518	wMel_cds518	wBm_cds89	wOo_cds196	wDi_fig|82301.12.peg.96
PANOCT_519	wMel_cds519	wBm_cds88	wOo_cds195	wDi_fig|82301.12.peg.97
PANOCT_520	wMel_cds520	wBm_cds87	wOo_cds194	wDi_fig|82301.12.peg.98
PANOCT_521	wMel_cds521	wBm_cds86	wOo_cds193	wDi_fig|82301.12.peg.99
PANOCT_522	wMel_cds522	wBm_cds157	wOo_cds138	wDi_fig|82301.12.peg.572
PANOCT_523	wMel_cds523	NA	NA	NA
PANOCT_524	wMel_cds524	wBm_cds105	NA	NA
PANOCT_525	wMel_cds525	NA	wOo_cds638	NA
PANOCT_526	wMel_cds526	NA	NA	NA
PANOCT_527	wMel_cds527	NA	NA	NA
PANOCT_528	wMel_cds528	NA	NA	NA
PANOCT_529	wMel_cds529	NA	NA	NA
PANOCT_530	wMel_cds530	NA	NA	NA
PANOCT_531	wMel_cds531	NA	NA	NA
PANOCT_532	wMel_cds532	NA	NA	NA
PANOCT_533	wMel_cds533	NA	NA	NA
PANOCT_534	wMel_cds534	NA	NA	NA
PANOCT_535	wMel_cds535	NA	NA	NA
PANOCT_536	wMel_cds536	NA	NA	NA
PANOCT_537	wMel_cds537	NA	NA	NA
PANOCT_538	wMel_cds538	NA	NA	NA
PANOCT_539	wMel_cds539	NA	NA	NA
PANOCT_540	wMel_cds540	NA	NA	NA
PANOCT_541	wMel_cds541	NA	NA	NA
PANOCT_542	wMel_cds542	NA	NA	NA
PANOCT_543	wMel_cds543	NA	NA	NA
PANOCT_544	wMel_cds544	NA	NA	NA
PANOCT_545	wMel_cds545	NA	NA	NA
PANOCT_546	wMel_cds546	NA	NA	NA
PANOCT_547	wMel_cds547	NA	NA	NA
PANOCT_548	wMel_cds548	NA	NA	NA
PANOCT_549	wMel_cds549	NA	NA	NA
PANOCT_550	wMel_cds550	NA	NA	NA
PANOCT_551	wMel_cds551	NA	NA	NA
PANOCT_552	wMel_cds552	NA	NA	NA
PANOCT_553	wMel_cds553	NA	NA	NA
PANOCT_554	wMel_cds554	NA	NA	NA
PANOCT_555	wMel_cds555	NA	NA	NA
PANOCT_556	wMel_cds556	NA	NA	NA
PANOCT_557	wMel_cds557	NA	NA	NA
PANOCT_558	wMel_cds558	NA	NA	NA
PANOCT_559	wMel_cds559	NA	NA	NA
PANOCT_560	wMel_cds560	NA	NA	NA
PANOCT_561	wMel_cds561	NA	NA	NA
PANOCT_562	wMel_cds562	NA	NA	NA
PANOCT_563	wMel_cds563	NA	NA	NA
PANOCT_564	wMel_cds564	NA	NA	NA
PANOCT_565	wMel_cds565	NA	NA	NA
PANOCT_566	wMel_cds566	NA	NA	NA
PANOCT_567	wMel_cds567	NA	NA	NA
PANOCT_568	wMel_cds568	NA	NA	NA
PANOCT_569	wMel_cds569	NA	NA	NA
PANOCT_570	wMel_cds570	NA	NA	NA
PANOCT_571	wMel_cds571	NA	NA	NA
PANOCT_572	wMel_cds572	NA	NA	NA
PANOCT_573	wMel_cds573	NA	NA	NA
PANOCT_574	wMel_cds574	NA	NA	NA
PANOCT_575	wMel_cds575	NA	NA	NA
PANOCT_576	wMel_cds576	wBm_cds501	NA	wDi_fig|82301.12.peg.485
PANOCT_577	wMel_cds577	NA	NA	NA
PANOCT_578	wMel_cds578	NA	NA	NA
PANOCT_579	wMel_cds579	NA	NA	NA
PANOCT_580	wMel_cds580	NA	NA	NA
PANOCT_581	wMel_cds581	NA	NA	NA
PANOCT_582	wMel_cds582	NA	NA	NA
PANOCT_583	wMel_cds583	NA	NA	NA
PANOCT_584	wMel_cds584	NA	NA	NA
PANOCT_585	wMel_cds585	NA	NA	NA
PANOCT_586	wMel_cds586	wBm_cds227	NA	NA
PANOCT_587	wMel_cds587	NA	NA	NA
PANOCT_588	wMel_cds588	NA	NA	NA
PANOCT_589	wMel_cds589	NA	NA	NA
PANOCT_590	wMel_cds590	NA	NA	NA
PANOCT_591	wMel_cds591	NA	NA	NA
PANOCT_592	wMel_cds593	NA	NA	NA
PANOCT_593	wMel_cds594	NA	NA	NA
PANOCT_594	wMel_cds595	NA	NA	NA
PANOCT_595	wMel_cds596	NA	NA	NA
PANOCT_596	wMel_cds597	NA	NA	NA
PANOCT_597	wMel_cds598	NA	NA	NA
PANOCT_598	wMel_cds599	NA	NA	NA
PANOCT_599	wMel_cds600	NA	NA	NA
PANOCT_600	wMel_cds601	NA	NA	NA
PANOCT_601	wMel_cds602	NA	NA	NA
PANOCT_602	wMel_cds603	NA	NA	NA
PANOCT_603	wMel_cds604	NA	NA	NA
PANOCT_604	wMel_cds605	NA	NA	NA
PANOCT_605	wMel_cds606	NA	NA	NA
PANOCT_606	wMel_cds607	NA	NA	NA
PANOCT_607	wMel_cds608	NA	NA	NA
PANOCT_608	wMel_cds609	wBm_cds378	wOo_cds557	wDi_fig|82301.12.peg.843
PANOCT_609	wMel_cds610	wBm_cds379	wOo_cds558	wDi_fig|82301.12.peg.842
PANOCT_610	wMel_cds611	wBm_cds380	wOo_cds559	wDi_fig|82301.12.peg.841
PANOCT_611	wMel_cds612	wBm_cds381	wOo_cds560	wDi_fig|82301.12.peg.840
PANOCT_612	wMel_cds613	wBm_cds382	wOo_cds561	wDi_fig|82301.12.peg.839
PANOCT_613	wMel_cds614	wBm_cds383	wOo_cds562	wDi_fig|82301.12.peg.838
PANOCT_614	wMel_cds615	wBm_cds384	wOo_cds563	wDi_fig|82301.12.peg.837
PANOCT_615	wMel_cds616	wBm_cds385	wOo_cds564	wDi_fig|82301.12.peg.836
PANOCT_616	wMel_cds617	wBm_cds386	NA	NA
PANOCT_617	wMel_cds618	wBm_cds387	wOo_cds677	wDi_fig|82301.12.peg.244
PANOCT_618	wMel_cds619	wBm_cds388	wOo_cds678	NA
PANOCT_619	wMel_cds620	wBm_cds389	wOo_cds679	wDi_fig|82301.12.peg.245
PANOCT_620	wMel_cds621	wBm_cds390	wOo_cds680	wDi_fig|82301.12.peg.246
PANOCT_621	wMel_cds622	wBm_cds391	wOo_cds681	wDi_fig|82301.12.peg.247
PANOCT_622	wMel_cds623	wBm_cds392	wOo_cds682	wDi_fig|82301.12.peg.248
PANOCT_623	wMel_cds624	wBm_cds393	wOo_cds683	wDi_fig|82301.12.peg.249
PANOCT_624	wMel_cds625	wBm_cds394	wOo_cds684	wDi_fig|82301.12.peg.250
PANOCT_625	wMel_cds626	wBm_cds395	wOo_cds685	wDi_fig|82301.12.peg.251
PANOCT_626	wMel_cds627	wBm_cds396	wOo_cds686	wDi_fig|82301.12.peg.252
PANOCT_627	wMel_cds628	wBm_cds397	wOo_cds687	wDi_fig|82301.12.peg.253
PANOCT_628	wMel_cds629	wBm_cds398	wOo_cds688	wDi_fig|82301.12.peg.254
PANOCT_629	wMel_cds630	wBm_cds399	wOo_cds689	wDi_fig|82301.12.peg.255
PANOCT_630	wMel_cds631	wBm_cds400	wOo_cds690	wDi_fig|82301.12.peg.256
PANOCT_631	wMel_cds632	wBm_cds401	wOo_cds691	wDi_fig|82301.12.peg.257
PANOCT_632	wMel_cds633	wBm_cds402	wOo_cds692	wDi_fig|82301.12.peg.258
PANOCT_633	wMel_cds634	wBm_cds403	wOo_cds693	wDi_fig|82301.12.peg.259
PANOCT_634	wMel_cds635	wBm_cds404	wOo_cds694	wDi_fig|82301.12.peg.260
PANOCT_635	wMel_cds636	wBm_cds405	wOo_cds695	wDi_fig|82301.12.peg.261
PANOCT_636	wMel_cds637	wBm_cds406	wOo_cds696	wDi_fig|82301.12.peg.262
PANOCT_637	wMel_cds638	wBm_cds407	wOo_cds697	wDi_fig|82301.12.peg.263
PANOCT_638	wMel_cds639	wBm_cds408	wOo_cds698	wDi_fig|82301.12.peg.264
PANOCT_639	wMel_cds640	wBm_cds409	wOo_cds699	wDi_fig|82301.12.peg.265
PANOCT_640	wMel_cds641	wBm_cds410	wOo_cds700	wDi_fig|82301.12.peg.266
PANOCT_641	wMel_cds642	wBm_cds411	wOo_cds701	wDi_fig|82301.12.peg.267
PANOCT_642	wMel_cds643	wBm_cds412	wOo_cds702	wDi_fig|82301.12.peg.268
PANOCT_643	wMel_cds644	wBm_cds413	wOo_cds703	NA
PANOCT_644	wMel_cds645	wBm_cds807	wOo_cds704	wDi_fig|82301.12.peg.269
PANOCT_645	wMel_cds646	wBm_cds808	wOo_cds705	wDi_fig|82301.12.peg.270
PANOCT_646	wMel_cds647	NA	wOo_cds647	NA
PANOCT_647	wMel_cds648	wBm_cds196	wOo_cds648	wDi_fig|82301.12.peg.209
PANOCT_648	wMel_cds649	NA	NA	NA
PANOCT_649	wMel_cds650	wBm_cds258	wOo_cds649	wDi_fig|82301.12.peg.211
PANOCT_650	wMel_cds651	NA	NA	NA
PANOCT_651	wMel_cds652	NA	NA	NA
PANOCT_652	wMel_cds653	NA	NA	NA
PANOCT_653	wMel_cds654	NA	NA	NA
PANOCT_654	wMel_cds655	wBm_cds586	wOo_cds664	wDi_fig|82301.12.peg.229
PANOCT_655	wMel_cds656	wBm_cds584	NA	NA
PANOCT_656	wMel_cds657	NA	NA	NA
PANOCT_657	wMel_cds658	NA	NA	NA
PANOCT_658	wMel_cds659	wBm_cds267	wOo_cds556	wDi_fig|82301.12.peg.614
PANOCT_659	wMel_cds660	wBm_cds268	NA	NA
PANOCT_660	wMel_cds661	wBm_cds29	wOo_cds512	wDi_fig|82301.12.peg.676
PANOCT_661	wMel_cds662	wBm_cds30	wOo_cds513	wDi_fig|82301.12.peg.675
PANOCT_662	wMel_cds663	wBm_cds31	wOo_cds514	NA
PANOCT_663	wMel_cds664	wBm_cds32	wOo_cds515	wDi_fig|82301.12.peg.674
PANOCT_664	wMel_cds665	wBm_cds33	wOo_cds516	wDi_fig|82301.12.peg.673
PANOCT_665	wMel_cds666	wBm_cds34	wOo_cds517	wDi_fig|82301.12.peg.672
PANOCT_666	wMel_cds667	wBm_cds35	NA	wDi_fig|82301.12.peg.668
PANOCT_667	wMel_cds668	wBm_cds624	NA	NA
PANOCT_668	wMel_cds669	wBm_cds285	wOo_cds507	wDi_fig|82301.12.peg.682
PANOCT_669	wMel_cds670	wBm_cds550	NA	NA
PANOCT_670	wMel_cds671	wBm_cds551	wOo_cds45	wDi_fig|82301.12.peg.342
PANOCT_671	wMel_cds672	wBm_cds552	wOo_cds44	wDi_fig|82301.12.peg.341
PANOCT_672	wMel_cds673	wBm_cds553	wOo_cds43	wDi_fig|82301.12.peg.340
PANOCT_673	wMel_cds674	wBm_cds554	wOo_cds42	wDi_fig|82301.12.peg.339
PANOCT_674	wMel_cds675	NA	NA	NA
PANOCT_675	wMel_cds676	NA	NA	NA
PANOCT_676	wMel_cds677	wBm_cds92	wOo_cds198	wDi_fig|82301.12.peg.94
PANOCT_677	wMel_cds678	wBm_cds91	NA	NA
PANOCT_678	wMel_cds679	wBm_cds745	NA	NA
PANOCT_679	wMel_cds680	NA	NA	NA
PANOCT_680	wMel_cds681	wBm_cds743	wOo_cds343	wDi_fig|82301.12.peg.436
PANOCT_681	wMel_cds682	wBm_cds742	wOo_cds344	NA
PANOCT_682	wMel_cds683	NA	NA	NA
PANOCT_683	wMel_cds684	wBm_cds741	wOo_cds345	wDi_fig|82301.12.peg.435
PANOCT_684	wMel_cds685	wBm_cds740	wOo_cds346	wDi_fig|82301.12.peg.434
PANOCT_685	wMel_cds686	wBm_cds739	wOo_cds347	wDi_fig|82301.12.peg.433
PANOCT_686	wMel_cds687	wBm_cds738	wOo_cds348	wDi_fig|82301.12.peg.432
PANOCT_687	wMel_cds688	wBm_cds737	wOo_cds349	wDi_fig|82301.12.peg.431
PANOCT_688	wMel_cds689	wBm_cds736	wOo_cds350	wDi_fig|82301.12.peg.430
PANOCT_689	wMel_cds690	wBm_cds735	wOo_cds351	wDi_fig|82301.12.peg.429
PANOCT_690	wMel_cds691	wBm_cds732	NA	NA
PANOCT_691	wMel_cds692	wBm_cds729	wOo_cds314	wDi_fig|82301.12.peg.482
PANOCT_692	wMel_cds693	wBm_cds728	wOo_cds315	wDi_fig|82301.12.peg.481
PANOCT_693	wMel_cds694	NA	NA	NA
PANOCT_694	wMel_cds695	wBm_cds271	wOo_cds174	wDi_fig|82301.12.peg.531
PANOCT_695	wMel_cds696	wBm_cds270	wOo_cds173	wDi_fig|82301.12.peg.532
PANOCT_696	wMel_cds697	NA	NA	NA
PANOCT_697	wMel_cds698	NA	NA	NA
PANOCT_698	wMel_cds699	NA	NA	NA
PANOCT_699	wMel_cds700	wBm_cds8	wOo_cds248	wDi_fig|82301.12.peg.37
PANOCT_700	wMel_cds701	wBm_cds9	wOo_cds249	wDi_fig|82301.12.peg.36
PANOCT_701	wMel_cds702	wBm_cds11	wOo_cds531	wDi_fig|82301.12.peg.651
PANOCT_702	wMel_cds703	wBm_cds12	NA	NA
PANOCT_703	wMel_cds704	NA	NA	NA
PANOCT_704	wMel_cds705	NA	NA	NA
PANOCT_705	wMel_cds706	wBm_cds687	wOo_cds3	wDi_fig|82301.12.peg.295
PANOCT_706	wMel_cds707	wBm_cds688	wOo_cds2	wDi_fig|82301.12.peg.294
PANOCT_707	wMel_cds708	wBm_cds689	wOo_cds1	wDi_fig|82301.12.peg.293
PANOCT_708	wMel_cds709	NA	NA	NA
PANOCT_709	wMel_cds710	wBm_cds692	NA	NA
PANOCT_710	wMel_cds711	wBm_cds693	wOo_cds717	wDi_fig|82301.12.peg.289
PANOCT_711	wMel_cds712	wBm_cds694	wOo_cds716	wDi_fig|82301.12.peg.288
PANOCT_712	wMel_cds713	wBm_cds508	wOo_cds301	wDi_fig|82301.12.peg.502
PANOCT_713	wMel_cds714	wBm_cds509	wOo_cds300	wDi_fig|82301.12.peg.503
PANOCT_714	wMel_cds715	wBm_cds510	NA	wDi_fig|82301.12.peg.504
PANOCT_715	wMel_cds716	wBm_cds511	wOo_cds298	wDi_fig|82301.12.peg.505
PANOCT_716	wMel_cds717	wBm_cds512	wOo_cds297	wDi_fig|82301.12.peg.506
PANOCT_717	wMel_cds718	wBm_cds513	wOo_cds296	wDi_fig|82301.12.peg.507
PANOCT_718	wMel_cds719	wBm_cds515	wOo_cds295	wDi_fig|82301.12.peg.508
PANOCT_719	wMel_cds720	wBm_cds516	wOo_cds294	NA
PANOCT_720	wMel_cds721	wBm_cds517	wOo_cds293	wDi_fig|82301.12.peg.509
PANOCT_721	wMel_cds722	wBm_cds358	NA	NA
PANOCT_722	wMel_cds723	wBm_cds97	wOo_cds136	wDi_fig|82301.12.peg.574
PANOCT_723	wMel_cds724	wBm_cds96	wOo_cds137	wDi_fig|82301.12.peg.573
PANOCT_724	wMel_cds725	wBm_cds266	wOo_cds555	wDi_fig|82301.12.peg.615
PANOCT_725	wMel_cds726	wBm_cds265	wOo_cds554	wDi_fig|82301.12.peg.617
PANOCT_726	wMel_cds727	wBm_cds264	wOo_cds553	wDi_fig|82301.12.peg.619
PANOCT_727	wMel_cds728	wBm_cds263	NA	NA
PANOCT_728	wMel_cds729	wBm_cds261	wOo_cds551	wDi_fig|82301.12.peg.620
PANOCT_729	wMel_cds730	wBm_cds260	wOo_cds550	wDi_fig|82301.12.peg.621
PANOCT_730	wMel_cds731	wBm_cds675	wOo_cds448	wDi_fig|82301.12.peg.184
PANOCT_731	wMel_cds732	wBm_cds545	wOo_cds332	wDi_fig|82301.12.peg.452
PANOCT_732	wMel_cds733	wBm_cds609	wOo_cds605	wDi_fig|82301.12.peg.791
PANOCT_733	wMel_cds734	wBm_cds610	wOo_cds604	wDi_fig|82301.12.peg.792
PANOCT_734	wMel_cds735	wBm_cds611	wOo_cds603	wDi_fig|82301.12.peg.793
PANOCT_735	wMel_cds736	wBm_cds612	wOo_cds602	wDi_fig|82301.12.peg.794
PANOCT_736	wMel_cds737	wBm_cds573	NA	NA
PANOCT_737	wMel_cds738	wBm_cds613	wOo_cds601	wDi_fig|82301.12.peg.795
PANOCT_738	wMel_cds739	wBm_cds696	wOo_cds713	wDi_fig|82301.12.peg.286
PANOCT_739	wMel_cds740	wBm_cds695	wOo_cds715	wDi_fig|82301.12.peg.287
PANOCT_740	wMel_cds741	wBm_cds443	wOo_cds154	wDi_fig|82301.12.peg.551
PANOCT_741	wMel_cds742	wBm_cds445	NA	wDi_fig|82301.12.peg.550
PANOCT_742	wMel_cds743	wBm_cds446	wOo_cds155	wDi_fig|82301.12.peg.549
PANOCT_743	wMel_cds744	NA	NA	NA
PANOCT_744	wMel_cds745	NA	NA	NA
PANOCT_745	wMel_cds746	wBm_cds644	wOo_cds538	wDi_fig|82301.12.peg.641
PANOCT_746	wMel_cds747	wBm_cds645	wOo_cds539	wDi_fig|82301.12.peg.640
PANOCT_747	wMel_cds748	wBm_cds646	wOo_cds540	wDi_fig|82301.12.peg.639
PANOCT_748	wMel_cds749	wBm_cds647	wOo_cds185	wDi_fig|82301.12.peg.108
PANOCT_749	wMel_cds750	wBm_cds648	wOo_cds184	wDi_fig|82301.12.peg.109
PANOCT_750	wMel_cds751	wBm_cds649	wOo_cds183	wDi_fig|82301.12.peg.110
PANOCT_751	wMel_cds752	wBm_cds650	wOo_cds182	wDi_fig|82301.12.peg.111
PANOCT_752	wMel_cds753	wBm_cds154	wOo_cds75	wDi_fig|82301.12.peg.381
PANOCT_753	wMel_cds754	wBm_cds155	wOo_cds76	wDi_fig|82301.12.peg.382
PANOCT_754	wMel_cds755	NA	NA	NA
PANOCT_755	wMel_cds756	wBm_cds93	wOo_cds199	wDi_fig|82301.12.peg.92
PANOCT_756	wMel_cds757	NA	NA	NA
PANOCT_757	wMel_cds758	wBm_cds94	wOo_cds200	wDi_fig|82301.12.peg.91
PANOCT_758	wMel_cds759	wBm_cds95	wOo_cds201	wDi_fig|82301.12.peg.90
PANOCT_759	wMel_cds760	wBm_cds727	wOo_cds316	wDi_fig|82301.12.peg.478
PANOCT_760	wMel_cds761	wBm_cds793	wOo_cds242	wDi_fig|82301.12.peg.43
PANOCT_761	wMel_cds762	wBm_cds792	NA	NA
PANOCT_762	wMel_cds763	wBm_cds791	wOo_cds244	wDi_fig|82301.12.peg.41
PANOCT_763	wMel_cds764	wBm_cds790	wOo_cds245	wDi_fig|82301.12.peg.40
PANOCT_764	wMel_cds765	wBm_cds789	wOo_cds78	wDi_fig|82301.12.peg.384
PANOCT_765	wMel_cds766	wBm_cds788	wOo_cds79	wDi_fig|82301.12.peg.385
PANOCT_766	wMel_cds767	wBm_cds173	NA	NA
PANOCT_767	wMel_cds768	wBm_cds786	wOo_cds81	wDi_fig|82301.12.peg.387
PANOCT_768	wMel_cds769	NA	NA	NA
PANOCT_769	wMel_cds770	NA	NA	NA
PANOCT_770	wMel_cds771	wBm_cds950	wOo_cds398	wDi_fig|82301.12.peg.125
PANOCT_771	wMel_cds772	wBm_cds951	wOo_cds399	wDi_fig|82301.12.peg.126
PANOCT_772	wMel_cds773	NA	NA	NA
PANOCT_773	wMel_cds774	NA	wOo_cds401	NA
PANOCT_774	wMel_cds775	wBm_cds953	wOo_cds402	wDi_fig|82301.12.peg.129
PANOCT_775	wMel_cds776	wBm_cds954	wOo_cds403	wDi_fig|82301.12.peg.130
PANOCT_776	wMel_cds777	wBm_cds955	wOo_cds404	wDi_fig|82301.12.peg.131
PANOCT_777	wMel_cds778	wBm_cds142	NA	NA
PANOCT_778	wMel_cds779	wBm_cds958	wOo_cds407	wDi_fig|82301.12.peg.136
PANOCT_779	wMel_cds780	NA	NA	NA
PANOCT_780	wMel_cds781	NA	wOo_cds405	wDi_fig|82301.12.peg.133
PANOCT_781	wMel_cds782	wBm_cds959	wOo_cds442	wDi_fig|82301.12.peg.178
PANOCT_782	wMel_cds783	NA	NA	NA
PANOCT_783	wMel_cds784	NA	NA	NA
PANOCT_784	wMel_cds785	NA	NA	NA
PANOCT_785	wMel_cds786	wBm_cds616	wOo_cds96	wDi_fig|82301.12.peg.406
PANOCT_786	wMel_cds787	wBm_cds617	wOo_cds95	wDi_fig|82301.12.peg.405
PANOCT_787	wMel_cds788	wBm_cds618	wOo_cds94	wDi_fig|82301.12.peg.404
PANOCT_788	wMel_cds789	NA	NA	NA
PANOCT_789	wMel_cds790	wBm_cds619	wOo_cds93	wDi_fig|82301.12.peg.403
PANOCT_790	wMel_cds791	wBm_cds620	NA	NA
PANOCT_791	wMel_cds792	NA	NA	NA
PANOCT_792	wMel_cds793	wBm_cds984	wOo_cds92	wDi_fig|82301.12.peg.397
PANOCT_793	wMel_cds794	wBm_cds985	wOo_cds91	wDi_fig|82301.12.peg.396
PANOCT_794	wMel_cds795	wBm_cds986	wOo_cds90	wDi_fig|82301.12.peg.395
PANOCT_795	wMel_cds796	wBm_cds987	wOo_cds89	wDi_fig|82301.12.peg.394
PANOCT_796	wMel_cds797	NA	wOo_cds88	wDi_fig|82301.12.peg.393
PANOCT_797	wMel_cds798	wBm_cds989	wOo_cds87	wDi_fig|82301.12.peg.392
PANOCT_798	wMel_cds799	wBm_cds990	wOo_cds86	wDi_fig|82301.12.peg.391
PANOCT_799	wMel_cds800	wBm_cds991	wOo_cds85	NA
PANOCT_800	wMel_cds801	wBm_cds992	wOo_cds84	wDi_fig|82301.12.peg.390
PANOCT_801	wMel_cds802	NA	NA	NA
PANOCT_802	wMel_cds803	wBm_cds439	wOo_cds336	wDi_fig|82301.12.peg.448
PANOCT_803	wMel_cds804	wBm_cds812	wOo_cds709	wDi_fig|82301.12.peg.274
PANOCT_804	wMel_cds805	wBm_cds811	wOo_cds708	wDi_fig|82301.12.peg.273
PANOCT_805	wMel_cds806	wBm_cds810	wOo_cds707	wDi_fig|82301.12.peg.272
PANOCT_806	wMel_cds807	wBm_cds809	wOo_cds706	wDi_fig|82301.12.peg.271
PANOCT_807	wMel_cds808	wBm_cds504	wOo_cds82	wDi_fig|82301.12.peg.388
PANOCT_808	wMel_cds809	NA	NA	NA
PANOCT_809	wMel_cds810	wBm_cds489	wOo_cds262	wDi_fig|82301.12.peg.18
PANOCT_810	wMel_cds811	wBm_cds488	wOo_cds261	wDi_fig|82301.12.peg.19
PANOCT_811	wMel_cds812	wBm_cds487	wOo_cds260	wDi_fig|82301.12.peg.20
PANOCT_812	wMel_cds813	wBm_cds486	wOo_cds259	wDi_fig|82301.12.peg.21
PANOCT_813	wMel_cds814	wBm_cds485	wOo_cds258	wDi_fig|82301.12.peg.22
PANOCT_814	wMel_cds815	NA	NA	NA
PANOCT_815	wMel_cds816	NA	NA	NA
PANOCT_816	wMel_cds817	NA	NA	NA
PANOCT_817	wMel_cds818	NA	NA	NA
PANOCT_818	wMel_cds819	NA	NA	NA
PANOCT_819	wMel_cds820	NA	NA	NA
PANOCT_820	wMel_cds821	wBm_cds753	wOo_cds162	wDi_fig|82301.12.peg.545
PANOCT_821	wMel_cds822	wBm_cds752	wOo_cds161	wDi_fig|82301.12.peg.546
PANOCT_822	wMel_cds823	wBm_cds673	wOo_cds447	wDi_fig|82301.12.peg.183
PANOCT_823	wMel_cds824	wBm_cds672	wOo_cds446	wDi_fig|82301.12.peg.182
PANOCT_824	wMel_cds825	wBm_cds671	wOo_cds445	wDi_fig|82301.12.peg.181
PANOCT_825	wMel_cds826	wBm_cds670	wOo_cds444	wDi_fig|82301.12.peg.180
PANOCT_826	wMel_cds827	wBm_cds669	wOo_cds443	wDi_fig|82301.12.peg.179
PANOCT_827	wMel_cds828	NA	NA	NA
PANOCT_828	wMel_cds829	wBm_cds940	NA	NA
PANOCT_829	wMel_cds830	wBm_cds941	wOo_cds187	wDi_fig|82301.12.peg.107
PANOCT_830	wMel_cds831	wBm_cds942	wOo_cds188	wDi_fig|82301.12.peg.106
PANOCT_831	wMel_cds832	wBm_cds943	wOo_cds189	wDi_fig|82301.12.peg.105
PANOCT_832	wMel_cds833	wBm_cds944	wOo_cds190	wDi_fig|82301.12.peg.104
PANOCT_833	wMel_cds834	wBm_cds945	wOo_cds191	wDi_fig|82301.12.peg.103
PANOCT_834	wMel_cds835	wBm_cds946	wOo_cds192	wDi_fig|82301.12.peg.102
PANOCT_835	wMel_cds836	wBm_cds469	wOo_cds256	wDi_fig|82301.12.peg.27
PANOCT_836	wMel_cds837	wBm_cds484	wOo_cds257	wDi_fig|82301.12.peg.25
PANOCT_837	wMel_cds838	NA	NA	NA
PANOCT_838	wMel_cds839	NA	NA	NA
PANOCT_839	wMel_cds840	wBm_cds63	NA	NA
PANOCT_840	wMel_cds841	NA	NA	NA
PANOCT_841	wMel_cds842	NA	NA	NA
PANOCT_842	wMel_cds843	NA	NA	NA
PANOCT_843	wMel_cds844	NA	NA	NA
PANOCT_844	wMel_cds845	NA	NA	NA
PANOCT_845	wMel_cds846	wBm_cds27	wOo_cds510	wDi_fig|82301.12.peg.678
PANOCT_846	wMel_cds847	wBm_cds25	wOo_cds509	wDi_fig|82301.12.peg.680
PANOCT_847	wMel_cds848	wBm_cds24	wOo_cds508	wDi_fig|82301.12.peg.681
PANOCT_848	wMel_cds849	wBm_cds64	NA	NA
PANOCT_849	wMel_cds850	NA	NA	NA
PANOCT_850	wMel_cds851	NA	NA	NA
PANOCT_851	wMel_cds852	NA	NA	NA
PANOCT_852	wMel_cds853	NA	NA	NA
PANOCT_853	wMel_cds854	wBm_cds330	wOo_cds478	wDi_fig|82301.12.peg.713
PANOCT_854	wMel_cds855	wBm_cds329	wOo_cds477	wDi_fig|82301.12.peg.714
PANOCT_855	wMel_cds856	wBm_cds328	NA	NA
PANOCT_856	wMel_cds857	wBm_cds316	wOo_cds306	wDi_fig|82301.12.peg.498
PANOCT_857	wMel_cds858	wBm_cds269	NA	NA
PANOCT_858	wMel_cds859	wBm_cds599	NA	NA
PANOCT_859	wMel_cds860	NA	NA	NA
PANOCT_860	wMel_cds862	wBm_cds478	NA	NA
PANOCT_861	wMel_cds863	wBm_cds600	wOo_cds587	wDi_fig|82301.12.peg.811
PANOCT_862	wMel_cds864	wBm_cds601	wOo_cds588	wDi_fig|82301.12.peg.810
PANOCT_863	wMel_cds865	wBm_cds602	wOo_cds589	wDi_fig|82301.12.peg.809
PANOCT_864	wMel_cds866	wBm_cds603	wOo_cds596	wDi_fig|82301.12.peg.800
PANOCT_865	wMel_cds867	wBm_cds604	wOo_cds597	wDi_fig|82301.12.peg.799
PANOCT_866	wMel_cds868	wBm_cds605	wOo_cds598	wDi_fig|82301.12.peg.798
PANOCT_867	wMel_cds869	wBm_cds606	wOo_cds599	wDi_fig|82301.12.peg.797
PANOCT_868	wMel_cds870	NA	NA	NA
PANOCT_869	wMel_cds871	NA	NA	NA
PANOCT_870	wMel_cds872	NA	NA	NA
PANOCT_871	wMel_cds873	NA	NA	NA
PANOCT_872	wMel_cds874	wBm_cds896	wOo_cds421	wDi_fig|82301.12.peg.151
PANOCT_873	wMel_cds875	wBm_cds895	wOo_cds422	wDi_fig|82301.12.peg.152
PANOCT_874	wMel_cds876	wBm_cds894	wOo_cds423	wDi_fig|82301.12.peg.153
PANOCT_875	wMel_cds877	NA	NA	NA
PANOCT_876	wMel_cds878	NA	NA	NA
PANOCT_877	wMel_cds879	NA	NA	NA
PANOCT_878	wMel_cds880	wBm_cds651	NA	NA
PANOCT_879	wMel_cds881	NA	NA	NA
PANOCT_880	wMel_cds882	NA	NA	NA
PANOCT_881	wMel_cds883	NA	NA	NA
PANOCT_882	wMel_cds884	NA	NA	NA
PANOCT_883	wMel_cds885	NA	NA	NA
PANOCT_884	wMel_cds886	wBm_cds773	wOo_cds158	wDi_fig|82301.12.peg.548
PANOCT_885	wMel_cds887	wBm_cds598	wOo_cds675	wDi_fig|82301.12.peg.240
PANOCT_886	wMel_cds888	wBm_cds597	wOo_cds674	wDi_fig|82301.12.peg.239
PANOCT_887	wMel_cds889	wBm_cds596	wOo_cds673	wDi_fig|82301.12.peg.238
PANOCT_888	wMel_cds890	wBm_cds595	wOo_cds672	wDi_fig|82301.12.peg.237
PANOCT_889	wMel_cds891	wBm_cds52	wOo_cds218	wDi_fig|82301.12.peg.72
PANOCT_890	wMel_cds892	wBm_cds53	wOo_cds219	wDi_fig|82301.12.peg.71
PANOCT_891	wMel_cds893	NA	NA	NA
PANOCT_892	wMel_cds894	NA	NA	NA
PANOCT_893	wMel_cds895	wBm_cds54	wOo_cds220	wDi_fig|82301.12.peg.70
PANOCT_894	wMel_cds896	NA	NA	NA
PANOCT_895	wMel_cds897	NA	NA	NA
PANOCT_896	wMel_cds898	wBm_cds539	wOo_cds494	wDi_fig|82301.12.peg.695
PANOCT_897	wMel_cds899	NA	NA	NA
PANOCT_898	wMel_cds900	NA	NA	NA
PANOCT_899	wMel_cds901	NA	NA	NA
PANOCT_900	wMel_cds902	wBm_cds772	wOo_cds160	wDi_fig|82301.12.peg.547
PANOCT_901	wMel_cds903	NA	NA	NA
PANOCT_902	wMel_cds904	wBm_cds769	wOo_cds530	wDi_fig|82301.12.peg.652
PANOCT_903	wMel_cds905	wBm_cds768	wOo_cds529	wDi_fig|82301.12.peg.654
PANOCT_904	wMel_cds906	wBm_cds767	wOo_cds528	wDi_fig|82301.12.peg.655
PANOCT_905	wMel_cds907	wBm_cds766	wOo_cds527	wDi_fig|82301.12.peg.656
PANOCT_906	wMel_cds908	wBm_cds765	wOo_cds526	wDi_fig|82301.12.peg.658
PANOCT_907	wMel_cds909	wBm_cds764	wOo_cds525	wDi_fig|82301.12.peg.659
PANOCT_908	wMel_cds910	wBm_cds763	wOo_cds524	wDi_fig|82301.12.peg.661
PANOCT_909	wMel_cds911	NA	NA	NA
PANOCT_910	wMel_cds912	NA	NA	NA
PANOCT_911	wMel_cds913	wBm_cds627	NA	NA
PANOCT_912	wMel_cds914	wBm_cds580	wOo_cds153	wDi_fig|82301.12.peg.552
PANOCT_913	wMel_cds915	wBm_cds578	wOo_cds148	wDi_fig|82301.12.peg.559
PANOCT_914	wMel_cds916	wBm_cds577	wOo_cds149	wDi_fig|82301.12.peg.558
PANOCT_915	wMel_cds917	NA	NA	NA
PANOCT_916	wMel_cds918	wBm_cds576	wOo_cds150	wDi_fig|82301.12.peg.557
PANOCT_917	wMel_cds919	wBm_cds41	wOo_cds209	wDi_fig|82301.12.peg.82
PANOCT_918	wMel_cds920	wBm_cds849	wOo_cds56	wDi_fig|82301.12.peg.356
PANOCT_919	wMel_cds921	NA	NA	NA
PANOCT_920	wMel_cds922	wBm_cds758	wOo_cds521	wDi_fig|82301.12.peg.664
PANOCT_921	wMel_cds923	wBm_cds759	wOo_cds522	wDi_fig|82301.12.peg.663
PANOCT_922	wMel_cds924	wBm_cds760	wOo_cds523	wDi_fig|82301.12.peg.662
PANOCT_923	wMel_cds925	wBm_cds761	NA	NA
PANOCT_924	wMel_cds926	wBm_cds762	NA	NA
PANOCT_925	wMel_cds927	wBm_cds221	wOo_cds573	wDi_fig|82301.12.peg.825
PANOCT_926	wMel_cds928	wBm_cds220	wOo_cds574	wDi_fig|82301.12.peg.824
PANOCT_927	wMel_cds929	NA	NA	NA
PANOCT_928	wMel_cds930	NA	NA	NA
PANOCT_929	wMel_cds931	NA	NA	NA
PANOCT_930	wMel_cds932	NA	NA	NA
PANOCT_931	wMel_cds933	wBm_cds37	wOo_cds547	wDi_fig|82301.12.peg.625
PANOCT_932	wMel_cds934	wBm_cds907	wOo_cds411	wDi_fig|82301.12.peg.139
PANOCT_933	wMel_cds935	wBm_cds908	wOo_cds410	NA
PANOCT_934	wMel_cds936	wBm_cds911	wOo_cds409	wDi_fig|82301.12.peg.138
PANOCT_935	wMel_cds937	wBm_cds912	wOo_cds408	wDi_fig|82301.12.peg.137
PANOCT_936	wMel_cds938	wBm_cds906	wOo_cds412	wDi_fig|82301.12.peg.140
PANOCT_937	wMel_cds939	wBm_cds905	wOo_cds413	wDi_fig|82301.12.peg.141
PANOCT_938	wMel_cds940	NA	NA	NA
PANOCT_939	wMel_cds941	NA	NA	NA
PANOCT_940	wMel_cds942	NA	NA	NA
PANOCT_941	wMel_cds943	wBm_cds668	wOo_cds606	wDi_fig|82301.12.peg.789
PANOCT_942	wMel_cds944	wBm_cds667	wOo_cds607	wDi_fig|82301.12.peg.788
PANOCT_943	wMel_cds945	wBm_cds757	wOo_cds520	wDi_fig|82301.12.peg.665
PANOCT_944	wMel_cds946	wBm_cds756	wOo_cds519	wDi_fig|82301.12.peg.666
PANOCT_945	wMel_cds947	wBm_cds755	wOo_cds518	wDi_fig|82301.12.peg.667
PANOCT_946	wMel_cds948	wBm_cds153	wOo_cds127	wDi_fig|82301.12.peg.585
PANOCT_947	wMel_cds949	wBm_cds152	wOo_cds126	wDi_fig|82301.12.peg.586
PANOCT_948	wMel_cds950	wBm_cds23	NA	NA
PANOCT_949	wMel_cds951	NA	NA	NA
PANOCT_950	wMel_cds952	NA	NA	NA
PANOCT_951	wMel_cds953	wBm_cds284	wOo_cds271	wDi_fig|82301.12.peg.11
PANOCT_952	wMel_cds954	wBm_cds283	NA	NA
PANOCT_953	wMel_cds955	NA	NA	NA
PANOCT_954	wMel_cds956	NA	NA	NA
PANOCT_955	wMel_cds957	wBm_cds282	wOo_cds272	wDi_fig|82301.12.peg.10
PANOCT_956	wMel_cds958	wBm_cds281	wOo_cds273	wDi_fig|82301.12.peg.9
PANOCT_957	wMel_cds959	NA	NA	NA
PANOCT_958	wMel_cds960	wBm_cds279	wOo_cds274	wDi_fig|82301.12.peg.8
PANOCT_959	wMel_cds961	wBm_cds278	wOo_cds275	wDi_fig|82301.12.peg.7
PANOCT_960	wMel_cds962	wBm_cds277	wOo_cds276	wDi_fig|82301.12.peg.6
PANOCT_961	wMel_cds963	wBm_cds276	wOo_cds277	wDi_fig|82301.12.peg.5
PANOCT_962	wMel_cds964	wBm_cds275	wOo_cds278	wDi_fig|82301.12.peg.4
PANOCT_963	wMel_cds965	wBm_cds274	wOo_cds279	wDi_fig|82301.12.peg.3
PANOCT_964	wMel_cds966	wBm_cds1005	wOo_cds280	wDi_fig|82301.12.peg.2
PANOCT_965	wMel_cds967	wBm_cds0	wOo_cds281	wDi_fig|82301.12.peg.1
PANOCT_966	wMel_cds968	wBm_cds1	wOo_cds282	NA
PANOCT_967	wMel_cds969	wBm_cds3	NA	NA
PANOCT_968	wMel_cds970	wBm_cds4	wOo_cds283	wDi_fig|82301.12.peg.519
PANOCT_969	wMel_cds971	NA	NA	NA
PANOCT_970	wMel_cds972	NA	NA	NA
PANOCT_971	wMel_cds973	wBm_cds5	wOo_cds284	wDi_fig|82301.12.peg.518
PANOCT_972	wMel_cds974	wBm_cds7	NA	NA
PANOCT_973	wMel_cds975	wBm_cds468	wOo_cds255	wDi_fig|82301.12.peg.29
PANOCT_974	wMel_cds976	wBm_cds467	wOo_cds254	wDi_fig|82301.12.peg.30
PANOCT_975	wMel_cds977	wBm_cds518	NA	NA
PANOCT_976	wMel_cds978	wBm_cds519	wOo_cds307	wDi_fig|82301.12.peg.495
PANOCT_977	wMel_cds979	wBm_cds520	wOo_cds308	wDi_fig|82301.12.peg.494
PANOCT_978	wMel_cds980	wBm_cds521	NA	NA
PANOCT_979	wMel_cds981	wBm_cds522	wOo_cds309	wDi_fig|82301.12.peg.491
PANOCT_980	wMel_cds982	wBm_cds523	wOo_cds310	wDi_fig|82301.12.peg.490
PANOCT_981	wMel_cds983	wBm_cds524	wOo_cds235	NA
PANOCT_982	wMel_cds984	NA	NA	NA
PANOCT_983	wMel_cds985	wBm_cds538	wOo_cds493	wDi_fig|82301.12.peg.696
PANOCT_984	wMel_cds986	wBm_cds537	wOo_cds492	wDi_fig|82301.12.peg.697
PANOCT_985	wMel_cds987	wBm_cds536	wOo_cds491	NA
PANOCT_986	wMel_cds988	wBm_cds535	wOo_cds490	wDi_fig|82301.12.peg.698
PANOCT_987	wMel_cds989	wBm_cds534	wOo_cds489	wDi_fig|82301.12.peg.699
PANOCT_988	wMel_cds990	wBm_cds533	wOo_cds488	wDi_fig|82301.12.peg.700
PANOCT_989	wMel_cds991	wBm_cds532	wOo_cds487	wDi_fig|82301.12.peg.701
PANOCT_990	wMel_cds992	wBm_cds832	NA	wDi_fig|82301.12.peg.463
PANOCT_991	wMel_cds993	wBm_cds531	wOo_cds486	wDi_fig|82301.12.peg.702
PANOCT_992	wMel_cds994	wBm_cds530	wOo_cds485	wDi_fig|82301.12.peg.703
PANOCT_993	wMel_cds995	wBm_cds529	wOo_cds484	wDi_fig|82301.12.peg.704
PANOCT_994	wMel_cds996	wBm_cds528	wOo_cds483	wDi_fig|82301.12.peg.705
PANOCT_995	wMel_cds997	wBm_cds527	wOo_cds482	wDi_fig|82301.12.peg.706
PANOCT_996	wMel_cds998	wBm_cds526	wOo_cds237	wDi_fig|82301.12.peg.47
PANOCT_997	wMel_cds999	wBm_cds525	wOo_cds236	wDi_fig|82301.12.peg.48
PANOCT_998	wMel_cds1000	NA	NA	NA
PANOCT_999	wMel_cds1001	NA	NA	NA
PANOCT_1000	wMel_cds1002	wBm_cds960	wOo_cds441	wDi_fig|82301.12.peg.177
PANOCT_1001	wMel_cds1003	wBm_cds961	wOo_cds440	wDi_fig|82301.12.peg.176
PANOCT_1002	wMel_cds1004	NA	NA	NA
PANOCT_1003	wMel_cds1005	wBm_cds846	NA	NA
PANOCT_1004	wMel_cds1006	wBm_cds507	NA	NA
PANOCT_1005	wMel_cds1007	wBm_cds506	wOo_cds480	wDi_fig|82301.12.peg.708
PANOCT_1006	wMel_cds1008	wBm_cds505	wOo_cds481	wDi_fig|82301.12.peg.707
PANOCT_1007	wMel_cds1009	wBm_cds676	wOo_cds449	wDi_fig|82301.12.peg.185
PANOCT_1008	wMel_cds1010	wBm_cds61	wOo_cds225	wDi_fig|82301.12.peg.61
PANOCT_1009	wMel_cds1011	wBm_cds62	wOo_cds226	wDi_fig|82301.12.peg.60
PANOCT_1010	wMel_cds1012	wBm_cds65	wOo_cds227	wDi_fig|82301.12.peg.59
PANOCT_1011	wMel_cds1013	wBm_cds66	wOo_cds228	wDi_fig|82301.12.peg.58
PANOCT_1012	wMel_cds1014	wBm_cds67	wOo_cds229	wDi_fig|82301.12.peg.57
PANOCT_1013	wMel_cds1015	wBm_cds68	wOo_cds230	wDi_fig|82301.12.peg.56
PANOCT_1014	wMel_cds1016	wBm_cds69	wOo_cds231	wDi_fig|82301.12.peg.55
PANOCT_1015	wMel_cds1017	wBm_cds70	wOo_cds232	wDi_fig|82301.12.peg.54
PANOCT_1016	wMel_cds1018	wBm_cds71	NA	wDi_fig|82301.12.peg.53
PANOCT_1017	wMel_cds1019	wBm_cds72	NA	wDi_fig|82301.12.peg.51
PANOCT_1018	wMel_cds1020	wBm_cds73	wOo_cds233	wDi_fig|82301.12.peg.50
PANOCT_1019	wMel_cds1021	NA	NA	NA
PANOCT_1020	wMel_cds1022	wBm_cds709	wOo_cds11	wDi_fig|82301.12.peg.302
PANOCT_1021	wMel_cds1023	wBm_cds710	wOo_cds12	wDi_fig|82301.12.peg.303
PANOCT_1022	wMel_cds1024	NA	NA	NA
PANOCT_1023	wMel_cds1025	wBm_cds718	NA	NA
PANOCT_1024	wMel_cds1026	wBm_cds717	wOo_cds30	wDi_fig|82301.12.peg.323
PANOCT_1025	wMel_cds1027	wBm_cds716	wOo_cds31	wDi_fig|82301.12.peg.324
PANOCT_1026	wMel_cds1028	wBm_cds715	wOo_cds18	wDi_fig|82301.12.peg.308
PANOCT_1027	wMel_cds1029	wBm_cds795	wOo_cds240	wDi_fig|82301.12.peg.45
PANOCT_1028	wMel_cds1030	wBm_cds794	wOo_cds241	wDi_fig|82301.12.peg.44
PANOCT_1029	wMel_cds1031	wBm_cds726	wOo_cds139	wDi_fig|82301.12.peg.571
PANOCT_1030	wMel_cds1032	wBm_cds22	wOo_cds49	NA
PANOCT_1031	wMel_cds1033	wBm_cds21	wOo_cds48	wDi_fig|82301.12.peg.346
PANOCT_1032	wMel_cds1034	wBm_cds20	wOo_cds47	wDi_fig|82301.12.peg.345
PANOCT_1033	wMel_cds1035	wBm_cds19	wOo_cds46	wDi_fig|82301.12.peg.344
PANOCT_1034	wMel_cds1036	wBm_cds306	wOo_cds479	wDi_fig|82301.12.peg.709
PANOCT_1035	wMel_cds1037	wBm_cds305	wOo_cds302	wDi_fig|82301.12.peg.501
PANOCT_1036	wMel_cds1038	wBm_cds304	wOo_cds303	wDi_fig|82301.12.peg.500
PANOCT_1037	wMel_cds1039	wBm_cds303	wOo_cds304	NA
PANOCT_1038	wMel_cds1040	wBm_cds302	wOo_cds305	NA
PANOCT_1039	wMel_cds1041	NA	NA	NA
PANOCT_1040	wMel_cds1042	NA	NA	NA
PANOCT_1041	wMel_cds1043	NA	NA	NA
PANOCT_1042	wMel_cds1044	wBm_cds298	wOo_cds496	wDi_fig|82301.12.peg.694
PANOCT_1043	wMel_cds1045	NA	NA	NA
PANOCT_1044	wMel_cds1046	wBm_cds297	wOo_cds497	wDi_fig|82301.12.peg.693
PANOCT_1045	wMel_cds1047	wBm_cds296	NA	NA
PANOCT_1046	wMel_cds1048	wBm_cds295	wOo_cds498	wDi_fig|82301.12.peg.692
PANOCT_1047	wMel_cds1049	wBm_cds294	wOo_cds499	wDi_fig|82301.12.peg.691
PANOCT_1048	wMel_cds1050	wBm_cds293	wOo_cds500	wDi_fig|82301.12.peg.690
PANOCT_1049	wMel_cds1051	wBm_cds292	wOo_cds501	wDi_fig|82301.12.peg.689
PANOCT_1050	wMel_cds1052	wBm_cds291	wOo_cds502	wDi_fig|82301.12.peg.688
PANOCT_1051	wMel_cds1053	wBm_cds290	wOo_cds503	wDi_fig|82301.12.peg.687
PANOCT_1052	wMel_cds1054	wBm_cds289	wOo_cds504	wDi_fig|82301.12.peg.686
PANOCT_1053	wMel_cds1055	NA	NA	NA
PANOCT_1054	wMel_cds1056	wBm_cds288	wOo_cds505	wDi_fig|82301.12.peg.685
PANOCT_1055	wMel_cds1057	wBm_cds287	wOo_cds506	wDi_fig|82301.12.peg.684
PANOCT_1056	wMel_cds1058	wBm_cds286	NA	NA
PANOCT_1057	wMel_cds1059	NA	NA	NA
PANOCT_1058	wMel_cds1060	wBm_cds818	NA	NA
PANOCT_1059	wMel_cds1061	wBm_cds47	wOo_cds213	wDi_fig|82301.12.peg.78
PANOCT_1060	wMel_cds1062	wBm_cds48	wOo_cds214	wDi_fig|82301.12.peg.76
PANOCT_1061	wMel_cds1063	wBm_cds49	wOo_cds215	wDi_fig|82301.12.peg.75
PANOCT_1062	wMel_cds1064	wBm_cds206	NA	NA
PANOCT_1063	wMel_cds1065	NA	NA	NA
PANOCT_1064	wMel_cds1066	NA	NA	NA
PANOCT_1065	wMel_cds1067	wBm_cds455	NA	NA
PANOCT_1066	wMel_cds1068	wBm_cds50	wOo_cds216	wDi_fig|82301.12.peg.74
PANOCT_1067	wMel_cds1069	wBm_cds51	wOo_cds217	wDi_fig|82301.12.peg.73
PANOCT_1068	wMel_cds1070	wBm_cds331	NA	NA
PANOCT_1069	wMel_cds1071	wBm_cds499	wOo_cds312	wDi_fig|82301.12.peg.488
PANOCT_1070	wMel_cds1072	wBm_cds913	wOo_cds623	wDi_fig|82301.12.peg.767
PANOCT_1071	wMel_cds1073	wBm_cds914	wOo_cds622	wDi_fig|82301.12.peg.768
PANOCT_1072	wMel_cds1074	wBm_cds915	wOo_cds621	wDi_fig|82301.12.peg.770
PANOCT_1073	wMel_cds1075	wBm_cds916	wOo_cds620	wDi_fig|82301.12.peg.771
PANOCT_1074	wMel_cds1076	wBm_cds917	wOo_cds619	wDi_fig|82301.12.peg.772
PANOCT_1075	wMel_cds1077	wBm_cds918	wOo_cds618	wDi_fig|82301.12.peg.773
PANOCT_1076	wMel_cds1078	NA	NA	NA
PANOCT_1077	wMel_cds1079	wBm_cds719	NA	NA
PANOCT_1078	wMel_cds1080	wBm_cds720	wOo_cds143	wDi_fig|82301.12.peg.565
PANOCT_1079	wMel_cds1081	wBm_cds721	wOo_cds141	wDi_fig|82301.12.peg.567
PANOCT_1080	wMel_cds1082	wBm_cds722	wOo_cds140	wDi_fig|82301.12.peg.569
PANOCT_1081	wMel_cds1083	wBm_cds724	NA	NA
PANOCT_1082	wMel_cds1084	NA	NA	NA
PANOCT_1083	wMel_cds1085	wBm_cds725	NA	NA
PANOCT_1084	wMel_cds1086	NA	NA	NA
PANOCT_1085	wMel_cds1087	wBm_cds847	NA	NA
PANOCT_1086	wMel_cds1088	wBm_cds848	wOo_cds55	wDi_fig|82301.12.peg.355
PANOCT_1087	wMel_cds1089	wBm_cds939	wOo_cds175	wDi_fig|82301.12.peg.530
PANOCT_1088	wMel_cds1090	wBm_cds938	wOo_cds176	wDi_fig|82301.12.peg.529
PANOCT_1089	wMel_cds1091	wBm_cds937	NA	NA
PANOCT_1090	wMel_cds1092	wBm_cds936	wOo_cds177	wDi_fig|82301.12.peg.525
PANOCT_1091	wMel_cds1093	wBm_cds935	wOo_cds178	wDi_fig|82301.12.peg.524
PANOCT_1092	wMel_cds1094	wBm_cds934	wOo_cds179	wDi_fig|82301.12.peg.523
PANOCT_1093	wMel_cds1095	wBm_cds933	NA	NA
PANOCT_1094	wMel_cds1096	wBm_cds932	NA	NA
PANOCT_1095	wMel_cds1097	wBm_cds931	wOo_cds181	wDi_fig|82301.12.peg.522
PANOCT_1096	wMel_cds1098	NA	NA	NA
PANOCT_1097	wMel_cds1099	wBm_cds930	NA	wDi_fig|82301.12.peg.521
PANOCT_1098	wMel_cds1100	wBm_cds929	NA	NA
PANOCT_1099	wMel_cds1101	NA	NA	NA
PANOCT_1100	wMel_cds1102	wBm_cds897	wOo_cds420	wDi_fig|82301.12.peg.150
PANOCT_1101	wMel_cds1103	wBm_cds898	wOo_cds419	wDi_fig|82301.12.peg.149
PANOCT_1102	wMel_cds1104	wBm_cds899	wOo_cds418	wDi_fig|82301.12.peg.148
PANOCT_1103	wMel_cds1105	wBm_cds900	wOo_cds417	wDi_fig|82301.12.peg.147
PANOCT_1104	wMel_cds1106	wBm_cds901	wOo_cds416	wDi_fig|82301.12.peg.146
PANOCT_1105	wMel_cds1107	wBm_cds902	wOo_cds415	wDi_fig|82301.12.peg.145
PANOCT_1106	wMel_cds1108	wBm_cds903	wOo_cds414	wDi_fig|82301.12.peg.144
PANOCT_1107	wMel_cds1109	wBm_cds919	wOo_cds317	wDi_fig|82301.12.peg.477
PANOCT_1108	wMel_cds1110	wBm_cds920	wOo_cds318	wDi_fig|82301.12.peg.476
PANOCT_1109	wMel_cds1111	wBm_cds921	wOo_cds319	wDi_fig|82301.12.peg.474
PANOCT_1110	wMel_cds1112	wBm_cds922	wOo_cds320	wDi_fig|82301.12.peg.473
PANOCT_1111	wMel_cds1113	NA	NA	NA
PANOCT_1112	wMel_cds1114	wBm_cds923	wOo_cds202	wDi_fig|82301.12.peg.89
PANOCT_1113	wMel_cds1115	wBm_cds924	wOo_cds203	wDi_fig|82301.12.peg.88
PANOCT_1114	wMel_cds1116	NA	wOo_cds205	wDi_fig|82301.12.peg.87
PANOCT_1115	wMel_cds1117	wBm_cds928	wOo_cds328	wDi_fig|82301.12.peg.464
PANOCT_1116	wMel_cds1118	wBm_cds496	wOo_cds207	wDi_fig|82301.12.peg.84
PANOCT_1117	wMel_cds1119	wBm_cds495	wOo_cds206	wDi_fig|82301.12.peg.85
PANOCT_1118	wMel_cds1120	NA	NA	NA
PANOCT_1119	wMel_cds1121	wBm_cds629	NA	NA
PANOCT_1120	wMel_cds1122	wBm_cds630	NA	wDi_fig|82301.12.peg.783
PANOCT_1121	wMel_cds1123	wBm_cds631	wOo_cds609	wDi_fig|82301.12.peg.782
PANOCT_1122	wMel_cds1124	wBm_cds632	wOo_cds610	wDi_fig|82301.12.peg.781
PANOCT_1123	wMel_cds1125	wBm_cds633	wOo_cds611	wDi_fig|82301.12.peg.780
PANOCT_1124	wMel_cds1126	wBm_cds634	wOo_cds612	wDi_fig|82301.12.peg.779
PANOCT_1125	wMel_cds1127	wBm_cds635	wOo_cds613	wDi_fig|82301.12.peg.778
PANOCT_1126	wMel_cds1128	wBm_cds881	NA	NA
PANOCT_1127	wMel_cds1129	wBm_cds638	NA	NA
PANOCT_1128	wMel_cds1130	wBm_cds882	wOo_cds382	wDi_fig|82301.12.peg.866
PANOCT_1129	wMel_cds1131	wBm_cds883	wOo_cds381	wDi_fig|82301.12.peg.865
PANOCT_1130	wMel_cds1132	wBm_cds884	NA	NA
PANOCT_1131	wMel_cds1133	wBm_cds885	NA	NA
PANOCT_1132	wMel_cds1134	NA	NA	NA
PANOCT_1133	wMel_cds1135	wBm_cds594	wOo_cds671	wDi_fig|82301.12.peg.236
PANOCT_1134	wMel_cds1136	wBm_cds593	wOo_cds670	wDi_fig|82301.12.peg.234
PANOCT_1135	wMel_cds1137	wBm_cds592	wOo_cds669	wDi_fig|82301.12.peg.233
PANOCT_1136	wMel_cds1138	wBm_cds591	wOo_cds668	wDi_fig|82301.12.peg.232
PANOCT_1137	wMel_cds1139	wBm_cds590	NA	NA
PANOCT_1138	wMel_cds1140	NA	NA	NA
PANOCT_1139	wMel_cds1141	NA	NA	NA
PANOCT_1140	wMel_cds1142	NA	NA	NA
PANOCT_1141	wMel_cds1143	wBm_cds589	wOo_cds667	wDi_fig|82301.12.peg.230
PANOCT_1142	wMel_cds1144	wBm_cds588	wOo_cds666	NA
PANOCT_1143	wMel_cds1145	wBm_cds587	wOo_cds665	NA
PANOCT_1144	wMel_cds1146	wBm_cds877	wOo_cds115	wDi_fig|82301.12.peg.597
PANOCT_1145	wMel_cds1147	wBm_cds878	wOo_cds114	wDi_fig|82301.12.peg.598
PANOCT_1146	wMel_cds1148	wBm_cds879	wOo_cds113	wDi_fig|82301.12.peg.599
PANOCT_1147	wMel_cds1149	wBm_cds880	wOo_cds112	wDi_fig|82301.12.peg.600
PANOCT_1148	wMel_cds1150	wBm_cds115	wOo_cds326	NA
PANOCT_1149	wMel_cds1151	wBm_cds116	wOo_cds325	wDi_fig|82301.12.peg.466
PANOCT_1150	wMel_cds1152	wBm_cds119	wOo_cds324	wDi_fig|82301.12.peg.469
PANOCT_1151	wMel_cds1153	wBm_cds120	wOo_cds323	wDi_fig|82301.12.peg.470
PANOCT_1152	wMel_cds1154	NA	NA	NA
PANOCT_1153	wMel_cds1155	wBm_cds460	wOo_cds637	wDi_fig|82301.12.peg.189
PANOCT_1154	wMel_cds1156	wBm_cds176	NA	NA
PANOCT_1155	wMel_cds1157	wBm_cds178	wOo_cds360	wDi_fig|82301.12.peg.417
PANOCT_1156	wMel_cds1158	wBm_cds179	wOo_cds361	wDi_fig|82301.12.peg.416
PANOCT_1157	wMel_cds1159	wBm_cds180	NA	NA
PANOCT_1158	wMel_cds1160	wBm_cds181	wOo_cds362	wDi_fig|82301.12.peg.415
PANOCT_1159	wMel_cds1161	wBm_cds182	wOo_cds212	wDi_fig|82301.12.peg.79
PANOCT_1160	wMel_cds1162	wBm_cds183	wOo_cds211	wDi_fig|82301.12.peg.80
PANOCT_1161	wMel_cds1163	wBm_cds184	wOo_cds210	wDi_fig|82301.12.peg.81
PANOCT_1162	wMel_cds1164	NA	NA	NA
PANOCT_1163	wMel_cds1165	wBm_cds187	wOo_cds363	wDi_fig|82301.12.peg.413
PANOCT_1164	wMel_cds1166	wBm_cds188	wOo_cds364	wDi_fig|82301.12.peg.412
PANOCT_1165	wMel_cds1167	wBm_cds189	wOo_cds365	wDi_fig|82301.12.peg.411
PANOCT_1166	wMel_cds1168	wBm_cds190	wOo_cds366	wDi_fig|82301.12.peg.410
PANOCT_1167	wMel_cds1169	wBm_cds191	wOo_cds367	wDi_fig|82301.12.peg.409
PANOCT_1168	wMel_cds1170	wBm_cds192	wOo_cds368	wDi_fig|82301.12.peg.408
PANOCT_1169	wMel_cds1171	wBm_cds135	NA	NA
PANOCT_1170	wMel_cds1172	NA	NA	NA
PANOCT_1171	wMel_cds1173	wBm_cds714	wOo_cds17	wDi_fig|82301.12.peg.307
PANOCT_1172	wMel_cds1174	wBm_cds40	wOo_cds208	wDi_fig|82301.12.peg.83
PANOCT_1173	wMel_cds1175	wBm_cds307	wOo_cds73	wDi_fig|82301.12.peg.376
PANOCT_1174	wMel_cds1176	wBm_cds308	wOo_cds72	wDi_fig|82301.12.peg.375
PANOCT_1175	wMel_cds1177	NA	NA	NA
PANOCT_1176	wMel_cds1178	wBm_cds59	wOo_cds224	wDi_fig|82301.12.peg.63
PANOCT_1177	wMel_cds1179	NA	NA	NA
PANOCT_1178	wMel_cds1180	wBm_cds57	NA	NA
PANOCT_1179	wMel_cds1181	wBm_cds56	wOo_cds222	wDi_fig|82301.12.peg.67
PANOCT_1180	wMel_cds1182	NA	NA	NA
PANOCT_1181	wMel_cds1183	NA	NA	NA
PANOCT_1182	wMel_cds1184	wBm_cds174	wOo_cds359	wDi_fig|82301.12.peg.419
PANOCT_1183	wMel_cds1185	NA	wOo_cds358	wDi_fig|82301.12.peg.421
PANOCT_1184	wMel_cds1186	wBm_cds165	wOo_cds357	wDi_fig|82301.12.peg.422
PANOCT_1185	wMel_cds1187	wBm_cds164	wOo_cds356	wDi_fig|82301.12.peg.423
PANOCT_1186	wMel_cds1188	wBm_cds163	wOo_cds355	wDi_fig|82301.12.peg.424
PANOCT_1187	wMel_cds1189	wBm_cds162	wOo_cds354	wDi_fig|82301.12.peg.425
PANOCT_1188	wMel_cds1190	wBm_cds161	NA	NA
PANOCT_1189	wMel_cds1191	wBm_cds160	wOo_cds353	NA
PANOCT_1190	wMel_cds1192	wBm_cds159	wOo_cds352	wDi_fig|82301.12.peg.426
PANOCT_1191	wMel_cds1193	wBm_cds158	NA	NA
PANOCT_1192	wMel_cds1194	wBm_cds126	NA	NA
PANOCT_1193	wMel_cds1195	NA	NA	NA
PANOCT_1194	wMel_cds1196	NA	NA	NA
PANOCT_1195	wMel_cds1197	wBm_cds886	NA	NA
PANOCT_1196	wMel_cds1198	wBm_cds583	wOo_cds662	wDi_fig|82301.12.peg.227
PANOCT_1197	wMel_cds1199	wBm_cds582	wOo_cds661	wDi_fig|82301.12.peg.226
PANOCT_1198	wMel_cds1200	NA	NA	NA
PANOCT_1199	wMel_cds1201	wBm_cds625	wOo_cds660	wDi_fig|82301.12.peg.225
PANOCT_1200	wMel_cds1202	NA	NA	NA
PANOCT_1201	wMel_cds1203	NA	NA	NA
PANOCT_1202	wMel_cds1204	wBm_cds438	NA	wDi_fig|82301.12.peg.446
PANOCT_1203	wMel_cds1205	wBm_cds477	wOo_cds125	wDi_fig|82301.12.peg.587
PANOCT_1204	wMel_cds1206	wBm_cds476	wOo_cds124	wDi_fig|82301.12.peg.588
PANOCT_1205	wMel_cds1207	wBm_cds475	wOo_cds123	wDi_fig|82301.12.peg.589
PANOCT_1206	wMel_cds1208	wBm_cds474	wOo_cds122	wDi_fig|82301.12.peg.590
PANOCT_1207	wMel_cds1209	wBm_cds473	wOo_cds121	wDi_fig|82301.12.peg.591
PANOCT_1208	wMel_cds1210	wBm_cds472	wOo_cds120	wDi_fig|82301.12.peg.592
PANOCT_1209	wMel_cds1211	wBm_cds471	wOo_cds119	wDi_fig|82301.12.peg.593
PANOCT_1210	wMel_cds1212	wBm_cds470	wOo_cds118	wDi_fig|82301.12.peg.594
PANOCT_1211	wMel_cds1213	wBm_cds482	wOo_cds117	wDi_fig|82301.12.peg.595
PANOCT_1212	wMel_cds1214	wBm_cds481	wOo_cds116	wDi_fig|82301.12.peg.596
PANOCT_1213	wMel_cds1215	wBm_cds479	wOo_cds633	wDi_fig|82301.12.peg.186
PANOCT_1214	wMel_cds1216	NA	NA	NA
PANOCT_1215	wMel_cds1217	wBm_cds464	NA	NA
PANOCT_1216	wMel_cds1218	wBm_cds463	wOo_cds634	wDi_fig|82301.12.peg.187
PANOCT_1217	wMel_cds1219	NA	NA	NA
PANOCT_1218	wMel_cds1220	wBm_cds461	wOo_cds636	wDi_fig|82301.12.peg.188
PANOCT_1219	wMel_cds1221	NA	NA	NA
PANOCT_1220	wMel_cds1222	wBm_cds652	wOo_cds541	wDi_fig|82301.12.peg.638
PANOCT_1221	wMel_cds1223	wBm_cds653	wOo_cds542	wDi_fig|82301.12.peg.637
PANOCT_1222	wMel_cds1224	wBm_cds654	wOo_cds543	wDi_fig|82301.12.peg.636
PANOCT_1223	wMel_cds1225	wBm_cds655	wOo_cds544	wDi_fig|82301.12.peg.635
PANOCT_1224	wMel_cds1226	wBm_cds656	NA	NA
PANOCT_1225	wMel_cds1227	wBm_cds657	NA	NA
PANOCT_1226	wMel_cds1228	wBm_cds334	wOo_cds640	wDi_fig|82301.12.peg.192
PANOCT_1227	NA	wBm_cds6	NA	NA
PANOCT_1228	NA	wBm_cds10	NA	NA
PANOCT_1229	NA	wBm_cds18	NA	NA
PANOCT_1230	NA	wBm_cds26	NA	NA
PANOCT_1231	NA	wBm_cds28	wOo_cds511	wDi_fig|82301.12.peg.677
PANOCT_1232	NA	wBm_cds36	NA	NA
PANOCT_1233	NA	wBm_cds38	NA	NA
PANOCT_1234	NA	wBm_cds39	NA	NA
PANOCT_1235	NA	wBm_cds42	NA	NA
PANOCT_1236	NA	wBm_cds43	NA	NA
PANOCT_1237	NA	wBm_cds44	NA	NA
PANOCT_1238	NA	wBm_cds45	NA	NA
PANOCT_1239	NA	wBm_cds46	NA	NA
PANOCT_1240	NA	wBm_cds55	wOo_cds221	wDi_fig|82301.12.peg.69
PANOCT_1241	NA	wBm_cds58	wOo_cds223	wDi_fig|82301.12.peg.64
PANOCT_1242	NA	wBm_cds60	NA	NA
PANOCT_1243	NA	wBm_cds74	NA	NA
PANOCT_1244	NA	wBm_cds75	NA	NA
PANOCT_1245	NA	wBm_cds81	NA	NA
PANOCT_1246	NA	wBm_cds82	NA	NA
PANOCT_1247	NA	wBm_cds83	NA	NA
PANOCT_1248	NA	wBm_cds84	NA	NA
PANOCT_1249	NA	wBm_cds85	NA	NA
PANOCT_1250	NA	wBm_cds98	NA	NA
PANOCT_1251	NA	wBm_cds99	NA	NA
PANOCT_1252	NA	wBm_cds107	NA	NA
PANOCT_1253	NA	wBm_cds108	NA	NA
PANOCT_1254	NA	wBm_cds112	NA	NA
PANOCT_1255	NA	wBm_cds113	NA	NA
PANOCT_1256	NA	wBm_cds114	NA	NA
PANOCT_1257	NA	wBm_cds117	NA	NA
PANOCT_1258	NA	wBm_cds118	NA	NA
PANOCT_1259	NA	wBm_cds127	NA	NA
PANOCT_1260	NA	wBm_cds128	NA	NA
PANOCT_1261	NA	wBm_cds129	NA	NA
PANOCT_1262	NA	wBm_cds131	NA	NA
PANOCT_1263	NA	wBm_cds136	NA	NA
PANOCT_1264	NA	wBm_cds147	NA	NA
PANOCT_1265	NA	wBm_cds166	NA	NA
PANOCT_1266	NA	wBm_cds167	NA	NA
PANOCT_1267	NA	wBm_cds168	NA	NA
PANOCT_1268	NA	wBm_cds169	NA	NA
PANOCT_1269	NA	wBm_cds170	NA	NA
PANOCT_1270	NA	wBm_cds171	NA	NA
PANOCT_1271	NA	wBm_cds175	NA	NA
PANOCT_1272	NA	wBm_cds185	NA	NA
PANOCT_1273	NA	wBm_cds193	NA	NA
PANOCT_1274	NA	wBm_cds194	NA	NA
PANOCT_1275	NA	wBm_cds195	NA	NA
PANOCT_1276	NA	wBm_cds199	NA	NA
PANOCT_1277	NA	wBm_cds200	NA	NA
PANOCT_1278	NA	wBm_cds201	NA	NA
PANOCT_1279	NA	wBm_cds202	NA	NA
PANOCT_1280	NA	wBm_cds203	NA	NA
PANOCT_1281	NA	wBm_cds226	NA	NA
PANOCT_1282	NA	wBm_cds235	NA	NA
PANOCT_1283	NA	wBm_cds240	NA	NA
PANOCT_1284	NA	wBm_cds243	NA	NA
PANOCT_1285	NA	wBm_cds244	NA	NA
PANOCT_1286	NA	wBm_cds247	NA	NA
PANOCT_1287	NA	wBm_cds252	NA	NA
PANOCT_1288	NA	wBm_cds259	NA	NA
PANOCT_1289	NA	wBm_cds262	NA	NA
PANOCT_1290	NA	wBm_cds299	NA	NA
PANOCT_1291	NA	wBm_cds301	NA	NA
PANOCT_1292	NA	wBm_cds309	NA	NA
PANOCT_1293	NA	wBm_cds317	NA	NA
PANOCT_1294	NA	wBm_cds318	NA	NA
PANOCT_1295	NA	wBm_cds319	NA	NA
PANOCT_1296	NA	wBm_cds320	NA	NA
PANOCT_1297	NA	wBm_cds321	NA	NA
PANOCT_1298	NA	wBm_cds322	NA	NA
PANOCT_1299	NA	wBm_cds324	NA	NA
PANOCT_1300	NA	wBm_cds351	NA	NA
PANOCT_1301	NA	wBm_cds352	NA	NA
PANOCT_1302	NA	wBm_cds354	NA	NA
PANOCT_1303	NA	wBm_cds359	NA	NA
PANOCT_1304	NA	wBm_cds360	NA	NA
PANOCT_1305	NA	wBm_cds363	NA	NA
PANOCT_1306	NA	wBm_cds366	NA	NA
PANOCT_1307	NA	wBm_cds372	NA	NA
PANOCT_1308	NA	wBm_cds421	NA	NA
PANOCT_1309	NA	wBm_cds425	NA	NA
PANOCT_1310	NA	wBm_cds428	NA	NA
PANOCT_1311	NA	wBm_cds444	NA	NA
PANOCT_1312	NA	wBm_cds447	NA	NA
PANOCT_1313	NA	wBm_cds452	NA	NA
PANOCT_1314	NA	wBm_cds453	NA	NA
PANOCT_1315	NA	wBm_cds459	NA	NA
PANOCT_1316	NA	wBm_cds462	NA	NA
PANOCT_1317	NA	wBm_cds466	NA	NA
PANOCT_1318	NA	wBm_cds480	NA	NA
PANOCT_1319	NA	wBm_cds483	NA	NA
PANOCT_1320	NA	wBm_cds491	NA	NA
PANOCT_1321	NA	wBm_cds493	NA	NA
PANOCT_1322	NA	wBm_cds502	NA	NA
PANOCT_1323	NA	wBm_cds514	NA	NA
PANOCT_1324	NA	wBm_cds540	NA	NA
PANOCT_1325	NA	wBm_cds543	NA	NA
PANOCT_1326	NA	wBm_cds544	NA	NA
PANOCT_1327	NA	wBm_cds570	NA	NA
PANOCT_1328	NA	wBm_cds571	NA	NA
PANOCT_1329	NA	wBm_cds581	NA	NA
PANOCT_1330	NA	wBm_cds607	NA	NA
PANOCT_1331	NA	wBm_cds608	NA	NA
PANOCT_1332	NA	wBm_cds621	NA	NA
PANOCT_1333	NA	wBm_cds622	NA	NA
PANOCT_1334	NA	wBm_cds623	NA	wDi_fig|82301.12.peg.399
PANOCT_1335	NA	wBm_cds626	NA	NA
PANOCT_1336	NA	wBm_cds628	NA	NA
PANOCT_1337	NA	wBm_cds636	NA	NA
PANOCT_1338	NA	wBm_cds637	NA	NA
PANOCT_1339	NA	wBm_cds639	NA	NA
PANOCT_1340	NA	wBm_cds640	NA	NA
PANOCT_1341	NA	wBm_cds641	wOo_cds156	NA
PANOCT_1342	NA	wBm_cds643	NA	NA
PANOCT_1343	NA	wBm_cds658	NA	NA
PANOCT_1344	NA	wBm_cds674	NA	NA
PANOCT_1345	NA	wBm_cds677	NA	NA
PANOCT_1346	NA	wBm_cds685	NA	NA
PANOCT_1347	NA	wBm_cds699	NA	NA
PANOCT_1348	NA	wBm_cds723	NA	NA
PANOCT_1349	NA	wBm_cds730	NA	NA
PANOCT_1350	NA	wBm_cds733	NA	NA
PANOCT_1351	NA	wBm_cds734	NA	NA
PANOCT_1352	NA	wBm_cds744	NA	NA
PANOCT_1353	NA	wBm_cds746	NA	NA
PANOCT_1354	NA	wBm_cds754	NA	NA
PANOCT_1355	NA	wBm_cds770	NA	NA
PANOCT_1356	NA	wBm_cds771	NA	NA
PANOCT_1357	NA	wBm_cds774	NA	NA
PANOCT_1358	NA	wBm_cds775	NA	NA
PANOCT_1359	NA	wBm_cds776	NA	NA
PANOCT_1360	NA	wBm_cds785	NA	NA
PANOCT_1361	NA	wBm_cds822	NA	NA
PANOCT_1362	NA	wBm_cds825	NA	NA
PANOCT_1363	NA	wBm_cds828	NA	NA
PANOCT_1364	NA	wBm_cds829	NA	NA
PANOCT_1365	NA	wBm_cds844	NA	NA
PANOCT_1366	NA	wBm_cds850	NA	NA
PANOCT_1367	NA	wBm_cds851	NA	NA
PANOCT_1368	NA	wBm_cds853	NA	NA
PANOCT_1369	NA	wBm_cds866	NA	NA
PANOCT_1370	NA	wBm_cds870	NA	NA
PANOCT_1371	NA	wBm_cds871	NA	NA
PANOCT_1372	NA	wBm_cds873	NA	NA
PANOCT_1373	NA	wBm_cds875	NA	NA
PANOCT_1374	NA	wBm_cds887	NA	NA
PANOCT_1375	NA	wBm_cds889	NA	NA
PANOCT_1376	NA	wBm_cds891	NA	NA
PANOCT_1377	NA	wBm_cds892	NA	NA
PANOCT_1378	NA	wBm_cds893	NA	NA
PANOCT_1379	NA	wBm_cds904	NA	NA
PANOCT_1380	NA	wBm_cds910	NA	NA
PANOCT_1381	NA	wBm_cds925	NA	NA
PANOCT_1382	NA	wBm_cds926	NA	NA
PANOCT_1383	NA	wBm_cds927	NA	NA
PANOCT_1384	NA	wBm_cds952	wOo_cds400	wDi_fig|82301.12.peg.127
PANOCT_1385	NA	wBm_cds956	NA	NA
PANOCT_1386	NA	wBm_cds957	NA	NA
PANOCT_1387	NA	wBm_cds962	NA	NA
PANOCT_1388	NA	wBm_cds963	NA	NA
PANOCT_1389	NA	wBm_cds965	NA	NA
PANOCT_1390	NA	wBm_cds968	NA	NA
PANOCT_1391	NA	wBm_cds971	NA	NA
PANOCT_1392	NA	wBm_cds972	NA	NA
PANOCT_1393	NA	wBm_cds973	NA	NA
PANOCT_1394	NA	wBm_cds978	NA	NA
PANOCT_1395	NA	wBm_cds979	NA	NA
PANOCT_1396	NA	wBm_cds983	NA	NA
PANOCT_1397	NA	wBm_cds988	NA	NA
PANOCT_1398	NA	wBm_cds998	NA	NA
PANOCT_1399	NA	wBm_cds1003	NA	NA
PANOCT_1400	NA	wBm_cds1004	NA	NA
PANOCT_1401	NA	NA	wOo_cds0	NA
PANOCT_1402	NA	NA	wOo_cds9	NA
PANOCT_1403	NA	NA	wOo_cds16	NA
PANOCT_1404	NA	NA	wOo_cds25	NA
PANOCT_1405	NA	NA	wOo_cds80	NA
PANOCT_1406	NA	NA	wOo_cds128	NA
PANOCT_1407	NA	NA	wOo_cds142	wDi_fig|82301.12.peg.566
PANOCT_1408	NA	NA	wOo_cds157	NA
PANOCT_1409	NA	NA	wOo_cds171	NA
PANOCT_1410	NA	NA	wOo_cds172	NA
PANOCT_1411	NA	NA	wOo_cds180	NA
PANOCT_1412	NA	NA	wOo_cds186	NA
PANOCT_1413	NA	NA	wOo_cds234	NA
PANOCT_1414	NA	NA	wOo_cds243	NA
PANOCT_1415	NA	NA	wOo_cds265	NA
PANOCT_1416	NA	NA	wOo_cds299	NA
PANOCT_1417	NA	NA	wOo_cds327	NA
PANOCT_1418	NA	NA	wOo_cds337	NA
PANOCT_1419	NA	NA	wOo_cds406	wDi_fig|82301.12.peg.134
PANOCT_1420	NA	NA	wOo_cds535	NA
PANOCT_1421	NA	NA	wOo_cds548	NA
PANOCT_1422	NA	NA	wOo_cds552	NA
PANOCT_1423	NA	NA	wOo_cds567	NA
PANOCT_1424	NA	NA	wOo_cds577	NA
PANOCT_1425	NA	NA	wOo_cds590	NA
PANOCT_1426	NA	NA	wOo_cds600	NA
PANOCT_1427	NA	NA	wOo_cds635	NA
PANOCT_1428	NA	NA	wOo_cds655	wDi_fig|82301.12.peg.220
PANOCT_1429	NA	NA	wOo_cds663	NA
PANOCT_1430	NA	NA	NA	wDi_fig|82301.12.peg.16
PANOCT_1431	NA	NA	NA	wDi_fig|82301.12.peg.23
PANOCT_1432	NA	NA	NA	wDi_fig|82301.12.peg.26
PANOCT_1433	NA	NA	NA	wDi_fig|82301.12.peg.28
PANOCT_1434	NA	NA	NA	wDi_fig|82301.12.peg.31
PANOCT_1435	NA	NA	NA	wDi_fig|82301.12.peg.42
PANOCT_1436	NA	NA	NA	wDi_fig|82301.12.peg.49
PANOCT_1437	NA	NA	NA	wDi_fig|82301.12.peg.62
PANOCT_1438	NA	NA	NA	wDi_fig|82301.12.peg.65
PANOCT_1439	NA	NA	NA	wDi_fig|82301.12.peg.66
PANOCT_1440	NA	NA	NA	wDi_fig|82301.12.peg.77
PANOCT_1441	NA	NA	NA	wDi_fig|82301.12.peg.86
PANOCT_1442	NA	NA	NA	wDi_fig|82301.12.peg.93
PANOCT_1443	NA	NA	NA	wDi_fig|82301.12.peg.100
PANOCT_1444	NA	NA	NA	wDi_fig|82301.12.peg.101
PANOCT_1445	NA	NA	NA	wDi_fig|82301.12.peg.526
PANOCT_1446	NA	NA	NA	wDi_fig|82301.12.peg.527
PANOCT_1447	NA	NA	NA	wDi_fig|82301.12.peg.528
PANOCT_1448	NA	NA	NA	wDi_fig|82301.12.peg.539
PANOCT_1449	NA	NA	NA	wDi_fig|82301.12.peg.540
PANOCT_1450	NA	NA	NA	wDi_fig|82301.12.peg.541
PANOCT_1451	NA	NA	NA	wDi_fig|82301.12.peg.553
PANOCT_1452	NA	NA	NA	wDi_fig|82301.12.peg.554
PANOCT_1453	NA	NA	NA	wDi_fig|82301.12.peg.564
PANOCT_1454	NA	NA	NA	wDi_fig|82301.12.peg.568
PANOCT_1455	NA	NA	NA	wDi_fig|82301.12.peg.570
PANOCT_1456	NA	NA	NA	wDi_fig|82301.12.peg.576
PANOCT_1457	NA	NA	NA	wDi_fig|82301.12.peg.577
PANOCT_1458	NA	NA	NA	wDi_fig|82301.12.peg.581
PANOCT_1459	NA	NA	NA	wDi_fig|82301.12.peg.584
PANOCT_1460	NA	NA	NA	wDi_fig|82301.12.peg.616
PANOCT_1461	NA	NA	NA	wDi_fig|82301.12.peg.618
PANOCT_1462	NA	NA	NA	wDi_fig|82301.12.peg.622
PANOCT_1463	NA	NA	NA	wDi_fig|82301.12.peg.624
PANOCT_1464	NA	NA	NA	wDi_fig|82301.12.peg.628
PANOCT_1465	NA	NA	NA	wDi_fig|82301.12.peg.633
PANOCT_1466	NA	NA	NA	wDi_fig|82301.12.peg.634
PANOCT_1467	NA	NA	NA	wDi_fig|82301.12.peg.644
PANOCT_1468	NA	NA	NA	wDi_fig|82301.12.peg.648
PANOCT_1469	NA	NA	NA	wDi_fig|82301.12.peg.649
PANOCT_1470	NA	NA	NA	wDi_fig|82301.12.peg.650
PANOCT_1471	NA	NA	NA	wDi_fig|82301.12.peg.653
PANOCT_1472	NA	NA	NA	wDi_fig|82301.12.peg.657
PANOCT_1473	NA	NA	NA	wDi_fig|82301.12.peg.660
PANOCT_1474	NA	NA	NA	wDi_fig|82301.12.peg.671
PANOCT_1475	NA	NA	NA	wDi_fig|82301.12.peg.683
PANOCT_1476	NA	NA	NA	wDi_fig|82301.12.peg.710
PANOCT_1477	NA	NA	NA	wDi_fig|82301.12.peg.711
PANOCT_1478	NA	NA	NA	wDi_fig|82301.12.peg.712
PANOCT_1479	NA	NA	NA	wDi_fig|82301.12.peg.715
PANOCT_1480	NA	NA	NA	wDi_fig|82301.12.peg.716
PANOCT_1481	NA	NA	NA	wDi_fig|82301.12.peg.717
PANOCT_1482	NA	NA	NA	wDi_fig|82301.12.peg.718
PANOCT_1483	NA	NA	NA	wDi_fig|82301.12.peg.719
PANOCT_1484	NA	NA	NA	wDi_fig|82301.12.peg.720
PANOCT_1485	NA	NA	NA	wDi_fig|82301.12.peg.721
PANOCT_1486	NA	NA	NA	wDi_fig|82301.12.peg.731
PANOCT_1487	NA	NA	NA	wDi_fig|82301.12.peg.732
PANOCT_1488	NA	NA	NA	wDi_fig|82301.12.peg.733
PANOCT_1489	NA	NA	NA	wDi_fig|82301.12.peg.741
PANOCT_1490	NA	NA	NA	wDi_fig|82301.12.peg.743
PANOCT_1491	NA	NA	NA	wDi_fig|82301.12.peg.747
PANOCT_1492	NA	NA	NA	wDi_fig|82301.12.peg.755
PANOCT_1493	NA	NA	NA	wDi_fig|82301.12.peg.760
PANOCT_1494	NA	NA	NA	wDi_fig|82301.12.peg.765
PANOCT_1495	NA	NA	NA	wDi_fig|82301.12.peg.766
PANOCT_1496	NA	NA	NA	wDi_fig|82301.12.peg.769
PANOCT_1497	NA	NA	NA	wDi_fig|82301.12.peg.785
PANOCT_1498	NA	NA	NA	wDi_fig|82301.12.peg.786
PANOCT_1499	NA	NA	NA	wDi_fig|82301.12.peg.790
PANOCT_1500	NA	NA	NA	wDi_fig|82301.12.peg.796
PANOCT_1501	NA	NA	NA	wDi_fig|82301.12.peg.804
PANOCT_1502	NA	NA	NA	wDi_fig|82301.12.peg.805
PANOCT_1503	NA	NA	NA	wDi_fig|82301.12.peg.832
PANOCT_1504	NA	NA	NA	wDi_fig|82301.12.peg.833
PANOCT_1505	NA	NA	NA	wDi_fig|82301.12.peg.835
PANOCT_1506	NA	NA	NA	wDi_fig|82301.12.peg.844
PANOCT_1507	NA	NA	NA	wDi_fig|82301.12.peg.848
PANOCT_1508	NA	NA	NA	wDi_fig|82301.12.peg.853
PANOCT_1509	NA	NA	NA	wDi_fig|82301.12.peg.855
PANOCT_1510	NA	NA	NA	wDi_fig|82301.12.peg.859
PANOCT_1511	NA	NA	NA	wDi_fig|82301.12.peg.860
PANOCT_1512	NA	NA	NA	wDi_fig|82301.12.peg.862
PANOCT_1513	NA	NA	NA	wDi_fig|82301.12.peg.863
PANOCT_1514	NA	NA	NA	wDi_fig|82301.12.peg.864
PANOCT_1515	NA	NA	NA	wDi_fig|82301.12.peg.868
PANOCT_1516	NA	NA	NA	wDi_fig|82301.12.peg.113
PANOCT_1517	NA	NA	NA	wDi_fig|82301.12.peg.128
PANOCT_1518	NA	NA	NA	wDi_fig|82301.12.peg.132
PANOCT_1519	NA	NA	NA	wDi_fig|82301.12.peg.135
PANOCT_1520	NA	NA	NA	wDi_fig|82301.12.peg.142
PANOCT_1521	NA	NA	NA	wDi_fig|82301.12.peg.143
PANOCT_1522	NA	NA	NA	wDi_fig|82301.12.peg.154
PANOCT_1523	NA	NA	NA	wDi_fig|82301.12.peg.156
PANOCT_1524	NA	NA	NA	wDi_fig|82301.12.peg.160
PANOCT_1525	NA	NA	NA	wDi_fig|82301.12.peg.161
PANOCT_1526	NA	NA	NA	wDi_fig|82301.12.peg.166
PANOCT_1527	NA	NA	NA	wDi_fig|82301.12.peg.170
PANOCT_1528	NA	NA	NA	wDi_fig|82301.12.peg.171
PANOCT_1529	NA	NA	NA	wDi_fig|82301.12.peg.191
PANOCT_1530	NA	NA	NA	wDi_fig|82301.12.peg.193
PANOCT_1531	NA	NA	NA	wDi_fig|82301.12.peg.194
PANOCT_1532	NA	NA	NA	wDi_fig|82301.12.peg.196
PANOCT_1533	NA	NA	NA	wDi_fig|82301.12.peg.200
PANOCT_1534	NA	NA	NA	wDi_fig|82301.12.peg.201
PANOCT_1535	NA	NA	NA	wDi_fig|82301.12.peg.202
PANOCT_1536	NA	NA	NA	wDi_fig|82301.12.peg.204
PANOCT_1537	NA	NA	NA	wDi_fig|82301.12.peg.205
PANOCT_1538	NA	NA	NA	wDi_fig|82301.12.peg.208
PANOCT_1539	NA	NA	NA	wDi_fig|82301.12.peg.210
PANOCT_1540	NA	NA	NA	wDi_fig|82301.12.peg.212
PANOCT_1541	NA	NA	NA	wDi_fig|82301.12.peg.213
PANOCT_1542	NA	NA	NA	wDi_fig|82301.12.peg.214
PANOCT_1543	NA	NA	NA	wDi_fig|82301.12.peg.228
PANOCT_1544	NA	NA	NA	wDi_fig|82301.12.peg.231
PANOCT_1545	NA	NA	NA	wDi_fig|82301.12.peg.235
PANOCT_1546	NA	NA	NA	wDi_fig|82301.12.peg.241
PANOCT_1547	NA	NA	NA	wDi_fig|82301.12.peg.242
PANOCT_1548	NA	NA	NA	wDi_fig|82301.12.peg.276
PANOCT_1549	NA	NA	NA	wDi_fig|82301.12.peg.277
PANOCT_1550	NA	NA	NA	wDi_fig|82301.12.peg.278
PANOCT_1551	NA	NA	NA	wDi_fig|82301.12.peg.279
PANOCT_1552	NA	NA	NA	wDi_fig|82301.12.peg.280
PANOCT_1553	NA	NA	NA	wDi_fig|82301.12.peg.281
PANOCT_1554	NA	NA	NA	wDi_fig|82301.12.peg.283
PANOCT_1555	NA	NA	NA	wDi_fig|82301.12.peg.285
PANOCT_1556	NA	NA	NA	wDi_fig|82301.12.peg.290
PANOCT_1557	NA	NA	NA	wDi_fig|82301.12.peg.291
PANOCT_1558	NA	NA	NA	wDi_fig|82301.12.peg.292
PANOCT_1559	NA	NA	NA	wDi_fig|82301.12.peg.309
PANOCT_1560	NA	NA	NA	wDi_fig|82301.12.peg.314
PANOCT_1561	NA	NA	NA	wDi_fig|82301.12.peg.322
PANOCT_1562	NA	NA	NA	wDi_fig|82301.12.peg.327
PANOCT_1563	NA	NA	NA	wDi_fig|82301.12.peg.330
PANOCT_1564	NA	NA	NA	wDi_fig|82301.12.peg.333
PANOCT_1565	NA	NA	NA	wDi_fig|82301.12.peg.334
PANOCT_1566	NA	NA	NA	wDi_fig|82301.12.peg.335
PANOCT_1567	NA	NA	NA	wDi_fig|82301.12.peg.337
PANOCT_1568	NA	NA	NA	wDi_fig|82301.12.peg.343
PANOCT_1569	NA	NA	NA	wDi_fig|82301.12.peg.347
PANOCT_1570	NA	NA	NA	wDi_fig|82301.12.peg.354
PANOCT_1571	NA	NA	NA	wDi_fig|82301.12.peg.362
PANOCT_1572	NA	NA	NA	wDi_fig|82301.12.peg.373
PANOCT_1573	NA	NA	NA	wDi_fig|82301.12.peg.374
PANOCT_1574	NA	NA	NA	wDi_fig|82301.12.peg.377
PANOCT_1575	NA	NA	NA	wDi_fig|82301.12.peg.379
PANOCT_1576	NA	NA	NA	wDi_fig|82301.12.peg.380
PANOCT_1577	NA	NA	NA	wDi_fig|82301.12.peg.386
PANOCT_1578	NA	NA	NA	wDi_fig|82301.12.peg.398
PANOCT_1579	NA	NA	NA	wDi_fig|82301.12.peg.400
PANOCT_1580	NA	NA	NA	wDi_fig|82301.12.peg.401
PANOCT_1581	NA	NA	NA	wDi_fig|82301.12.peg.402
PANOCT_1582	NA	NA	NA	wDi_fig|82301.12.peg.407
PANOCT_1583	NA	NA	NA	wDi_fig|82301.12.peg.414
PANOCT_1584	NA	NA	NA	wDi_fig|82301.12.peg.418
PANOCT_1585	NA	NA	NA	wDi_fig|82301.12.peg.420
PANOCT_1586	NA	NA	NA	wDi_fig|82301.12.peg.427
PANOCT_1587	NA	NA	NA	wDi_fig|82301.12.peg.428
PANOCT_1588	NA	NA	NA	wDi_fig|82301.12.peg.438
PANOCT_1589	NA	NA	NA	wDi_fig|82301.12.peg.444
PANOCT_1590	NA	NA	NA	wDi_fig|82301.12.peg.445
PANOCT_1591	NA	NA	NA	wDi_fig|82301.12.peg.447
PANOCT_1592	NA	NA	NA	wDi_fig|82301.12.peg.454
PANOCT_1593	NA	NA	NA	wDi_fig|82301.12.peg.462
PANOCT_1594	NA	NA	NA	wDi_fig|82301.12.peg.465
PANOCT_1595	NA	NA	NA	wDi_fig|82301.12.peg.467
PANOCT_1596	NA	NA	NA	wDi_fig|82301.12.peg.468
PANOCT_1597	NA	NA	NA	wDi_fig|82301.12.peg.475
PANOCT_1598	NA	NA	NA	wDi_fig|82301.12.peg.479
PANOCT_1599	NA	NA	NA	wDi_fig|82301.12.peg.480
PANOCT_1600	NA	NA	NA	wDi_fig|82301.12.peg.484
PANOCT_1601	NA	NA	NA	wDi_fig|82301.12.peg.486
PANOCT_1602	NA	NA	NA	wDi_fig|82301.12.peg.487
PANOCT_1603	NA	NA	NA	wDi_fig|82301.12.peg.492
PANOCT_1604	NA	NA	NA	wDi_fig|82301.12.peg.493
PANOCT_1605	NA	NA	NA	wDi_fig|82301.12.peg.496
PANOCT_1606	NA	NA	NA	wDi_fig|82301.12.peg.497
PANOCT_1607	NA	NA	NA	wDi_fig|82301.12.peg.499
PANOCT_1608	NA	NA	NA	wDi_fig|82301.12.peg.516
PANOCT_1609	NA	NA	NA	wDi_fig|82301.12.peg.517
